# Supplementary material
Source: publisher figshare collection journal article supplement (https://acs.figshare.com/ndownloader/files/3800368)

## *Electronic Supplementary Information for*

### **Air Oxidative Radical Oxysulfurization of Alkynes Leading to $\alpha$ -Thioaldehydes**

Shao-Fang Zhou,<sup>a</sup> Xiang-Qiang Pan,<sup>\*a</sup> Zhi-Hao Zhou,<sup>a</sup> Adedamola Shoberu,<sup>a</sup> Pei-Zhi Zhang,<sup>a</sup>  
Jian-Ping Zou<sup>\*a,b</sup>

<sup>a</sup> *Key Laboratory of Organic Synthesis of Jiangsu Province, College of Chemistry and  
Chemical Engineering, Soochow University, 199 Renai Street, Suzhou, Jiangsu 215123,  
China. [jpzou@suda.edu.cn](mailto:jpzou@suda.edu.cn); [panxq@suda.edu.cn](mailto:panxq@suda.edu.cn)*

<sup>b</sup> *Key Laboratory of Synthetic Chemistry of Natural Substances, Shanghai Institute of  
Organic Chemistry, Chinese Academy of Sciences, Shanghai 200032, China.*

#### **Table of contents**

|                                                                                                                                                                  |           |
|------------------------------------------------------------------------------------------------------------------------------------------------------------------|-----------|
| <b>1. SI-1. Optimization of the reaction conditions in detail</b>                                                                                                | <b>S2</b> |
| <b>2. The discussion of the reactions of 3-hydroxypropyne, <math>\alpha</math>-methoxypropyne and<br/><math>\alpha</math>-tert-butoxypropyne with thiophenol</b> | <b>S3</b> |
| <b>3. NMR spectra</b>                                                                                                                                            | <b>S4</b> |

### SI-1. Optimization of the reaction conditions in detail

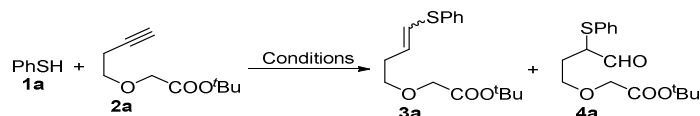

| Entry               | Solvent                         | Ratio<br>( <b>1a</b> : <b>2a</b> ) | Temp<br>(°C) | Time<br>(h) | Yield(%)<br>( <b>3a</b> )/( <i>Z</i> and <i>E</i> ) <sup>a</sup> | Yield(%)<br>( <b>4a</b> ) <sup>a</sup> |
|---------------------|---------------------------------|------------------------------------|--------------|-------------|------------------------------------------------------------------|----------------------------------------|
| 1                   | DMF                             | 2:1                                | 25           | 24          | 37                                                               | 0                                      |
| 2                   | Toluene                         | 2:1                                | 25           | 24          | 2.2                                                              | 0                                      |
| 3                   | CH <sub>2</sub> Cl <sub>2</sub> | 2:1                                | 25           | 24          | 29                                                               | 0                                      |
| 4                   | CH <sub>3</sub> CN              | 2:1                                | 25           | 24          | 0                                                                | 0                                      |
| 5                   | <sup>t</sup> BuOH               | 2:1                                | 25           | 24          | 11                                                               | 25                                     |
| 6                   | 1,4-Dioxane                     | 2:1                                | 25           | 24          | 17                                                               | 28                                     |
| 7                   | THF                             | 2:1                                | 25           | 24          | 15                                                               | 29                                     |
| 8                   | 1,2-dimethoxyethane             | 2:1                                | 25           | 24          | 14                                                               | 21                                     |
| 9 <sup>b</sup>      | DMF                             | 2:1                                | 25           | 24          | 30                                                               | 0                                      |
| 10 <sup>b</sup>     | THF                             | 2:1                                | 25           | 24          | 20                                                               | 38                                     |
| 11 <sup>c</sup>     | THF                             | 2:1                                | 25           | 24          | 0                                                                | 0                                      |
| 12 <sup>b</sup>     | THF                             | 0.5:1                              | 25           | 24          | 14                                                               | 0                                      |
| 13 <sup>b</sup>     | THF                             | 1:1                                | 25           | 24          | 34                                                               | 5                                      |
| 14 <sup>b</sup>     | THF                             | 1.5:1                              | 25           | 24          | 16                                                               | 31                                     |
| 15 <sup>b</sup>     | THF                             | 2.5:1                              | 25           | 24          | 20                                                               | 40                                     |
| 16 <sup>b</sup>     | THF                             | 3:1                                | 25           | 24          | 32                                                               | 31                                     |
| 17 <sup>b,d</sup>   | THF                             | 2:1                                | 25           | 1           | 0                                                                | 0                                      |
| 18 <sup>b,d</sup>   | THF                             | 2:1                                | 25           | 4           | 29                                                               | 0                                      |
| 19 <sup>b,d</sup>   | THF                             | 2:1                                | 25           | 8           | 42                                                               | 0                                      |
| 20 <sup>b,d</sup>   | THF                             | 2:1                                | 25           | 12          | 35                                                               | 22                                     |
| 21 <sup>b,d</sup>   | THF                             | 2:1                                | 25           | 24          | 20                                                               | 45                                     |
| 22 <sup>e</sup>     | DMF                             | 2:1                                | 25           | 24          | 68                                                               | 0                                      |
| 23 <sup>b,d,e</sup> | THF                             | 2:1                                | 25           | 24          | 25                                                               | 75                                     |
| 24 <sup>b,d,e</sup> | THF                             | 2:1                                | 25           | 48          | 2                                                                | 98                                     |
| 25 <sup>b,d,e</sup> | THF                             | 2:1                                | 25           | 72          | 9                                                                | 90                                     |
| 26 <sup>b,e</sup>   | THF                             | 2:1                                | 0            | 48          | 0                                                                | 0                                      |
| 27 <sup>b,e</sup>   | THF                             | 2:1                                | 13           | 48          | 27                                                               | 0                                      |
| 28 <sup>b,e</sup>   | THF                             | 2:1                                | 25           | 48          | 0                                                                | 77                                     |
| 29 <sup>b,e</sup>   | THF                             | 2:1                                | 40           | 48          | 70                                                               | 25                                     |
| 30 <sup>b,e</sup>   | THF                             | 2:1                                | 60           | 48          | 86                                                               | 1.4                                    |
| 31 <sup>d,e,f</sup> | THF                             | 2:1                                | 25           | 48          | 12                                                               | 70                                     |
| 32 <sup>b,d,g</sup> | THF                             | 2:1                                | 25           | 48          | 34                                                               | 0                                      |

<sup>a</sup>Isolated yield. <sup>b</sup>Addition of 5% mol H<sub>2</sub>O (1  $\mu$ L). <sup>c</sup>Anhydrous THF. <sup>d</sup>Gas chromatography yield. <sup>e</sup>Addition of 0.5% mol TBHP (1  $\mu$ L). <sup>f</sup>Addition of 4  $\mu$ L H<sub>2</sub>O. <sup>g</sup>Addition of 5% mol TBHP (10  $\mu$ L).

**The discussion of the reactions of 3-hydroxypropyne,  $\alpha$ -methoxypropyne and  $\alpha$ -tert-butoxypropyne with thiophenol**

The reaction of 3-hydroxypropyne with thiophenol was complicated. It may be attributed to the  $\alpha$ -hydroxyl group can activate the  $C\equiv C$  triple bond thus leading to complicated mixtures. To support this, reactions of substrates such as  $\alpha$ -methoxypropyne and  $\alpha$ -tert-butoxypropyne were carried out and unsurprisingly, similar results were obtained. In the case of 5-hydroxypentyne (**2o**), the hydroxy group is farther and could not activate the  $C\equiv C$  triple bond, instead directing the reaction to form selectively alkenylsulfide.

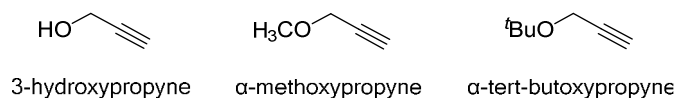

**Compound 4a**

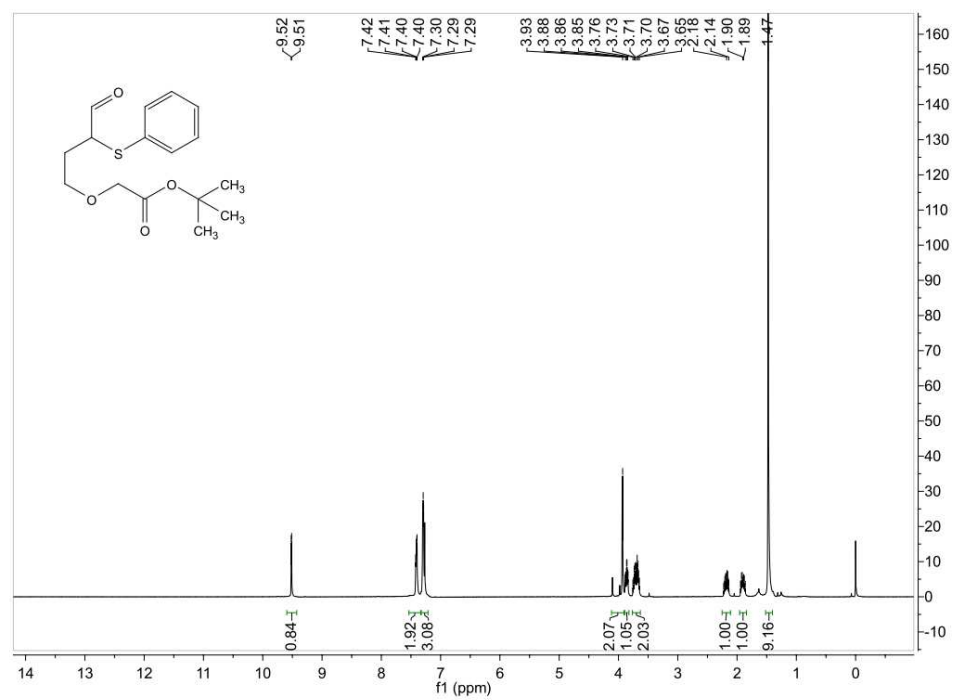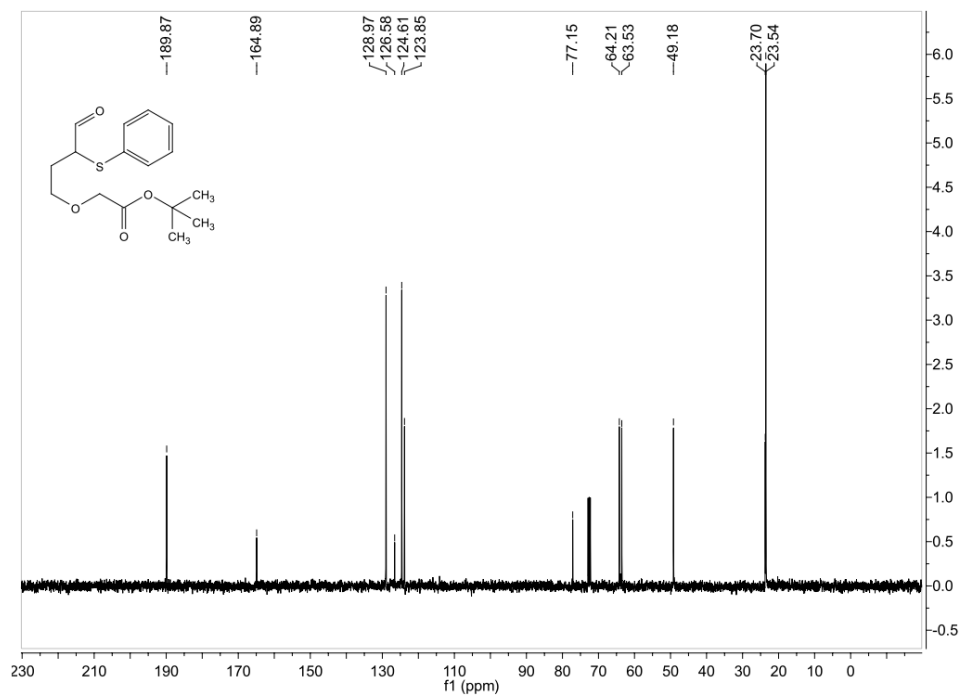

**Compound 4b**

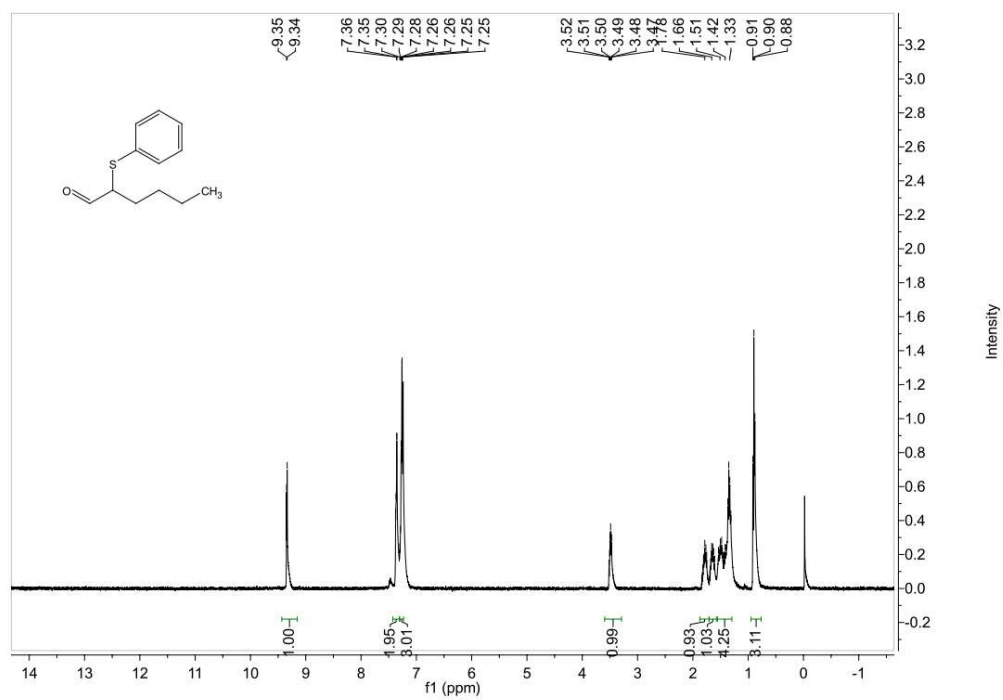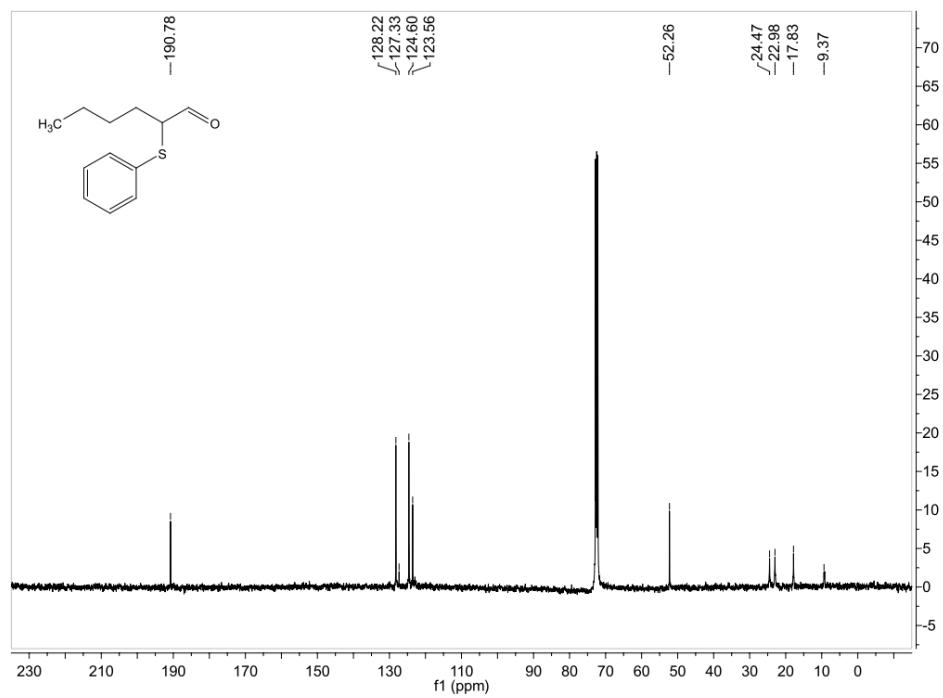

**Compound 4c**

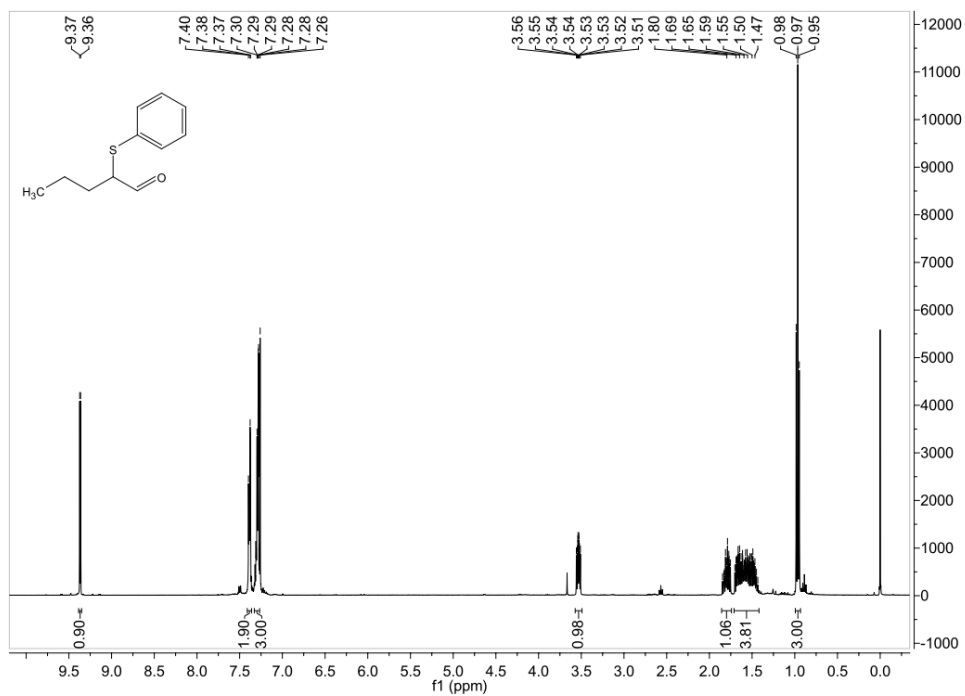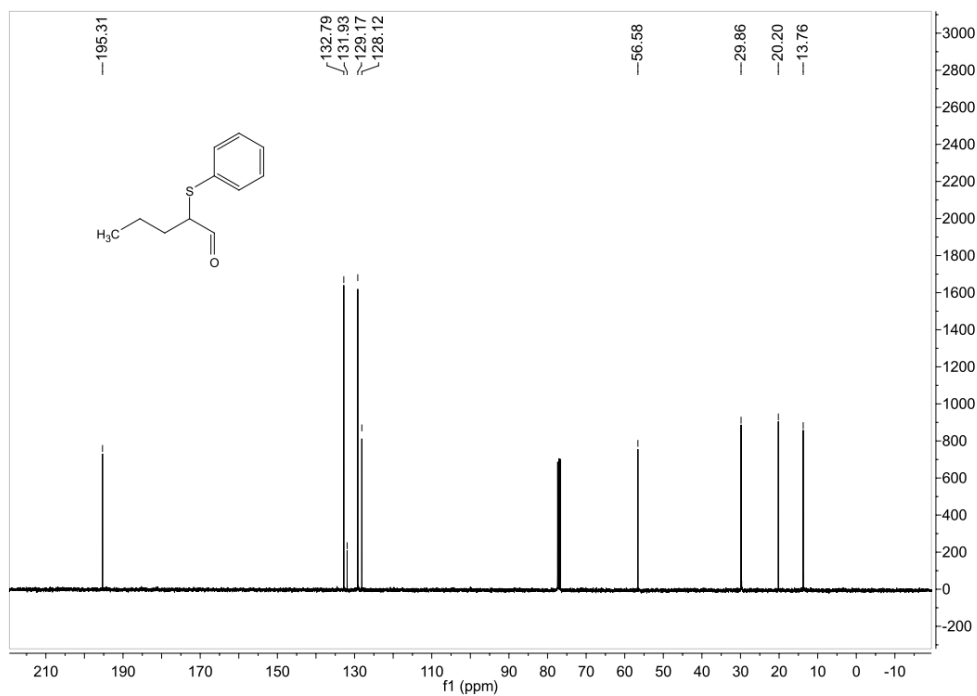

**Compound 4d**

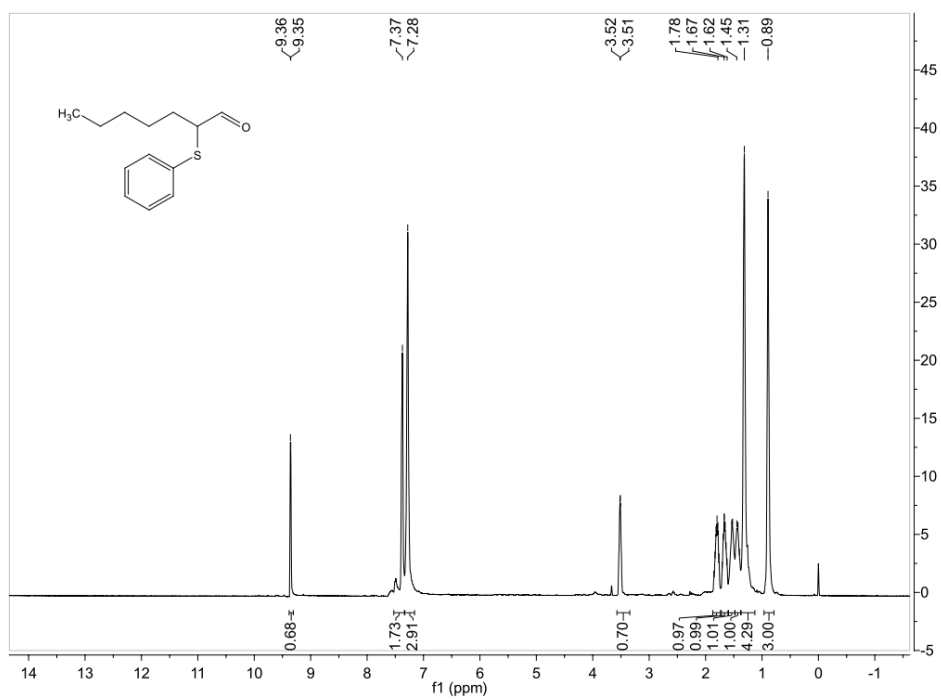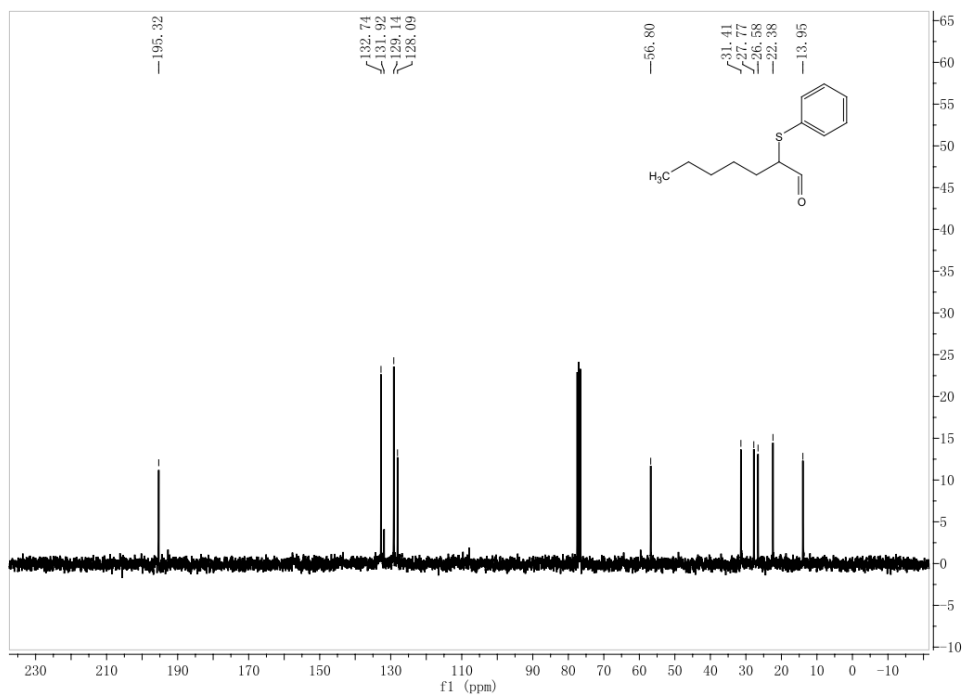

**Compound 4e**

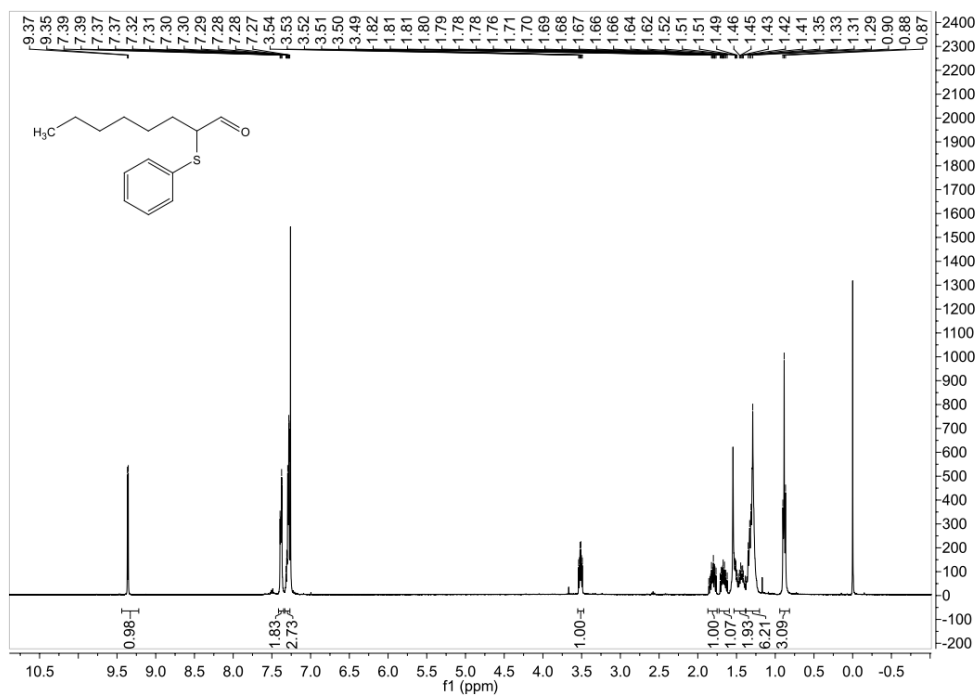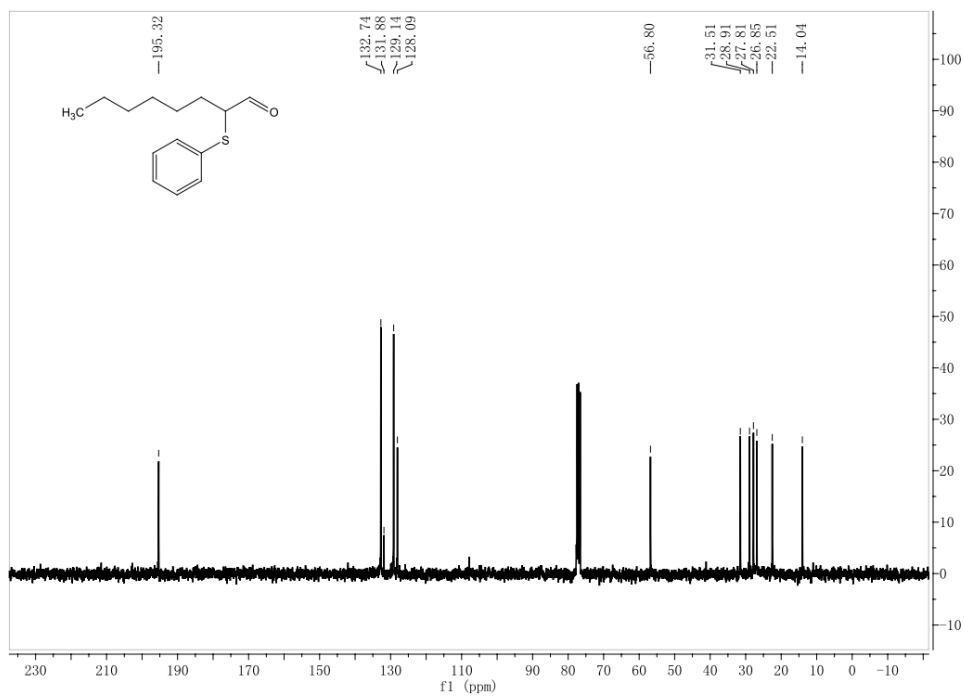



# Compound 4f

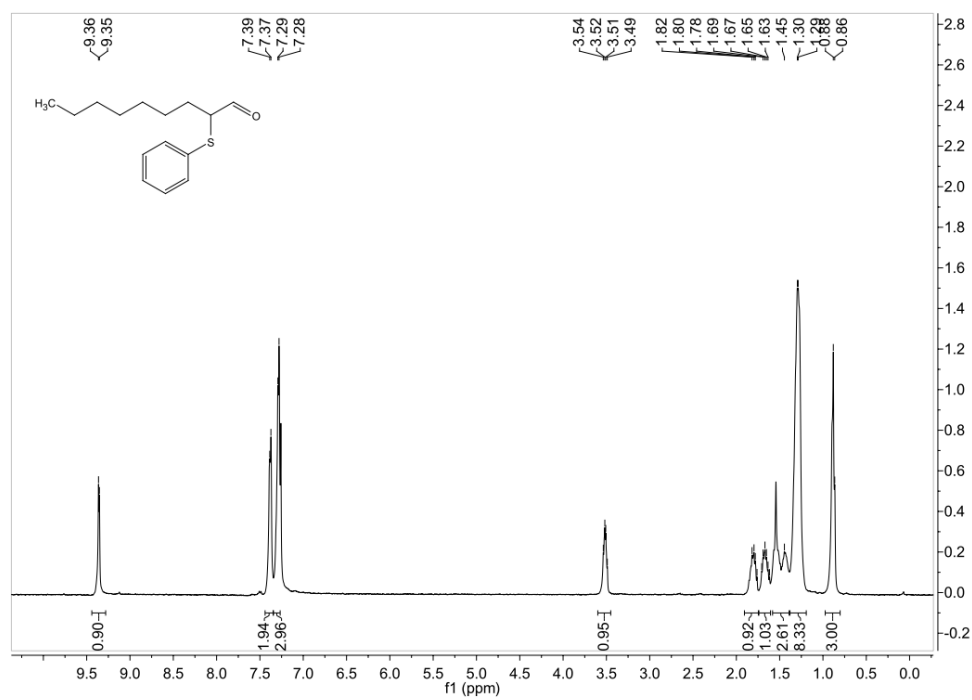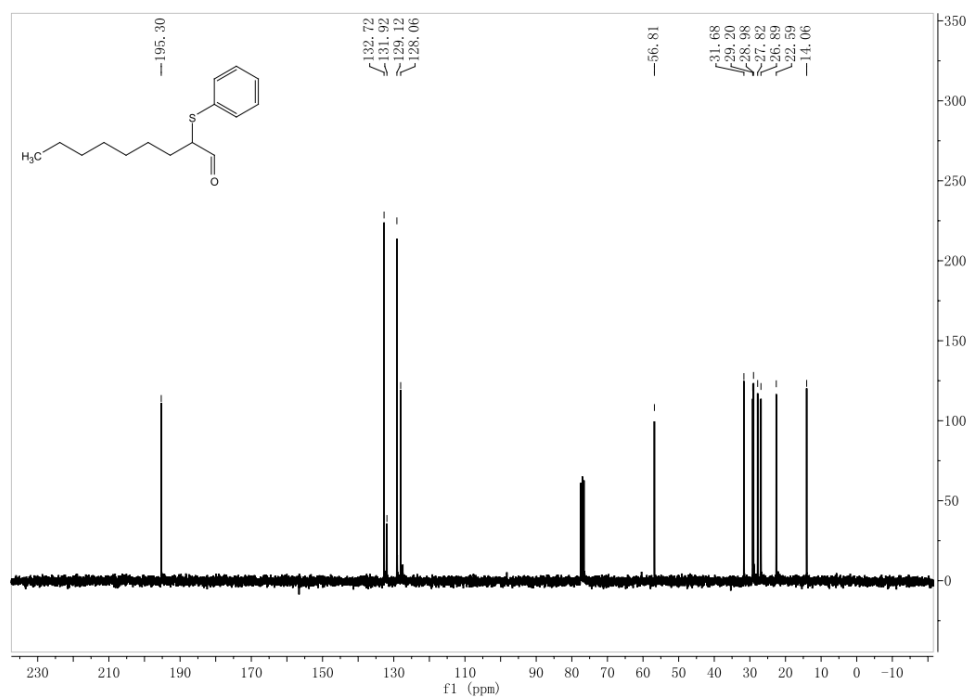

# Compound 4g

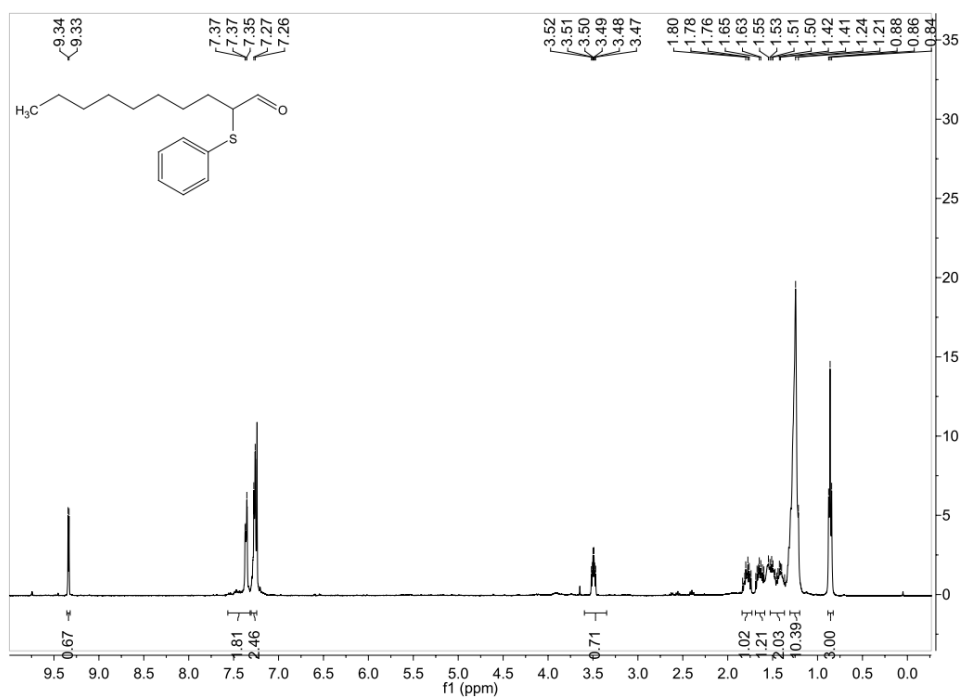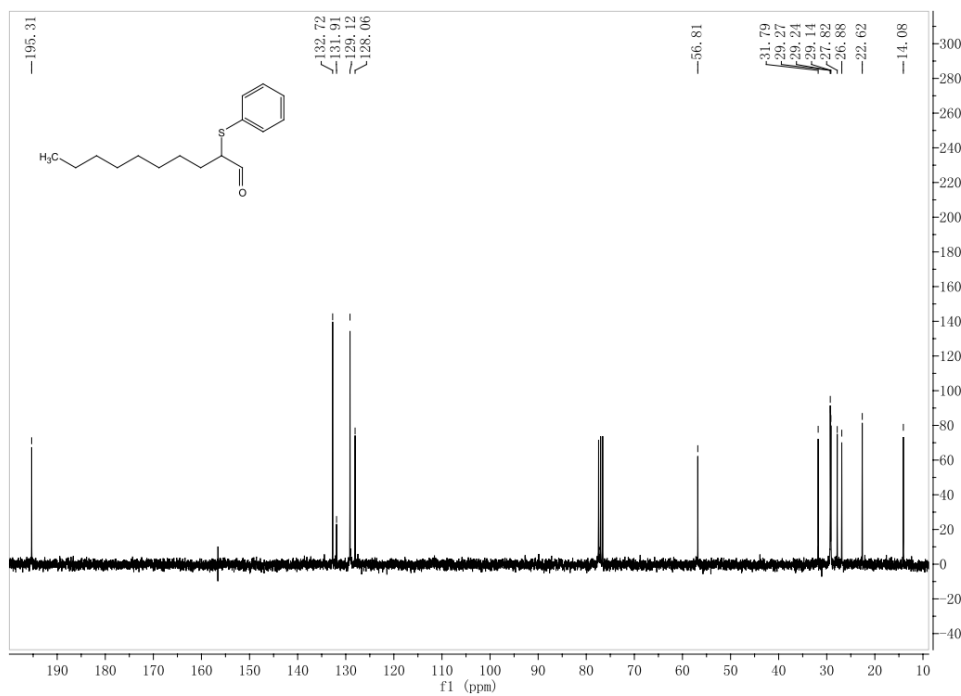

# Compounds 4h

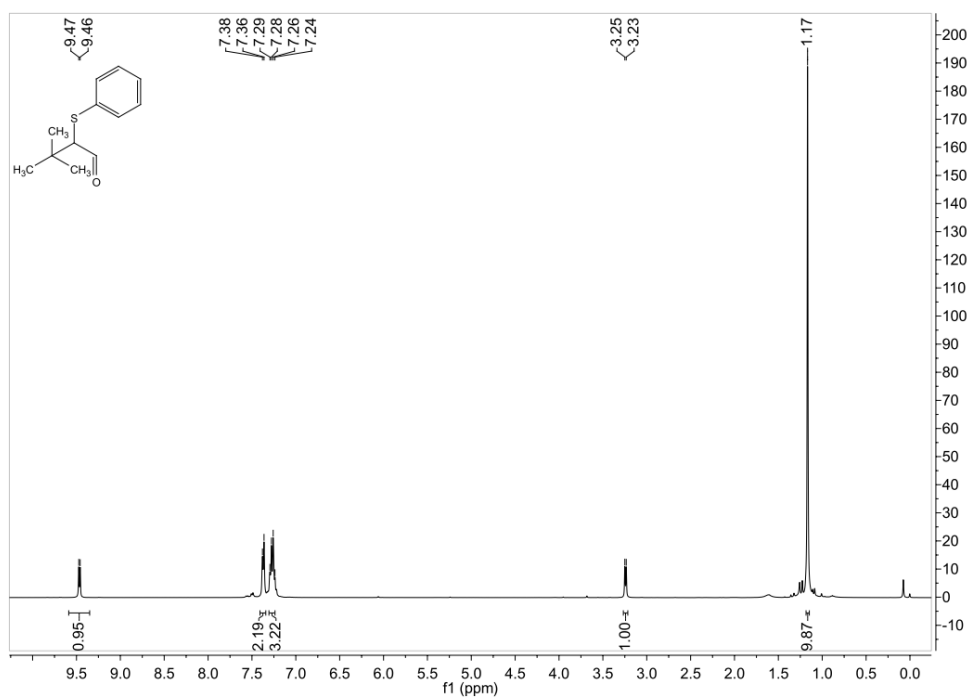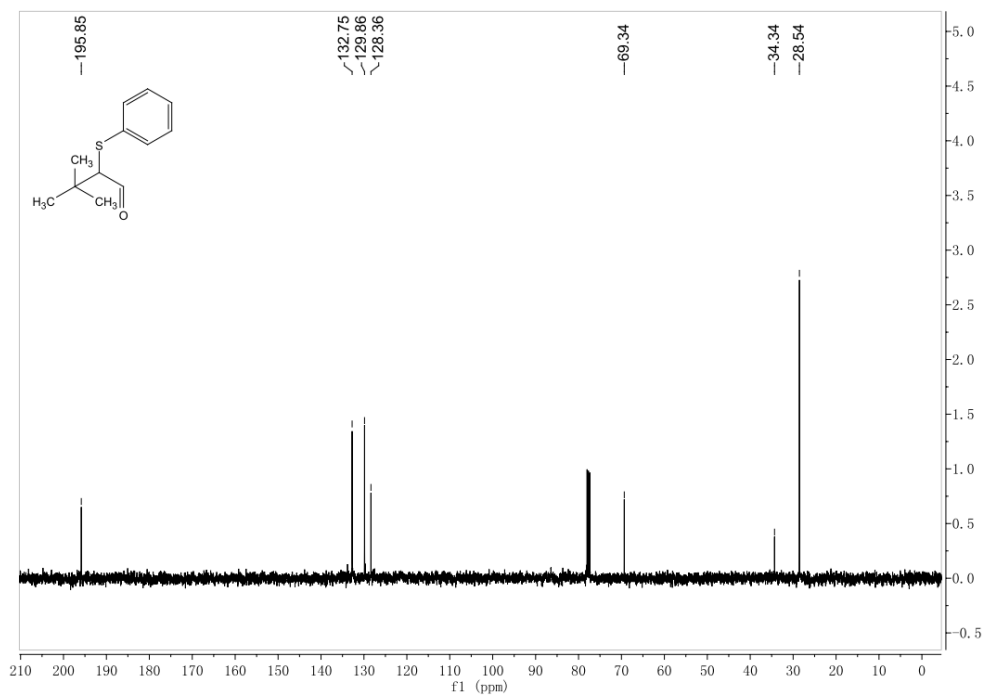

**Compound 4i**

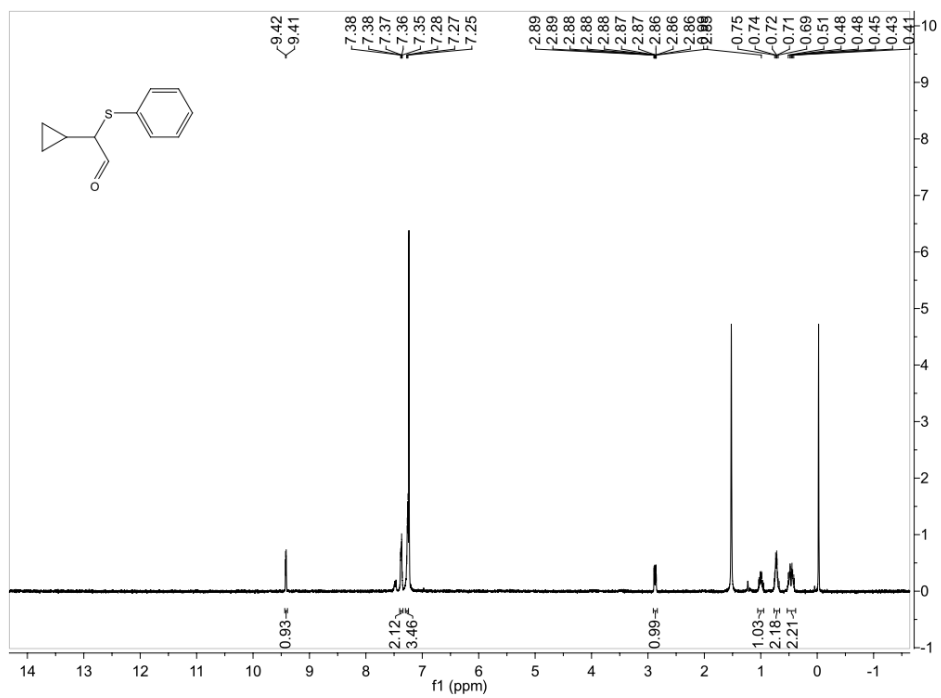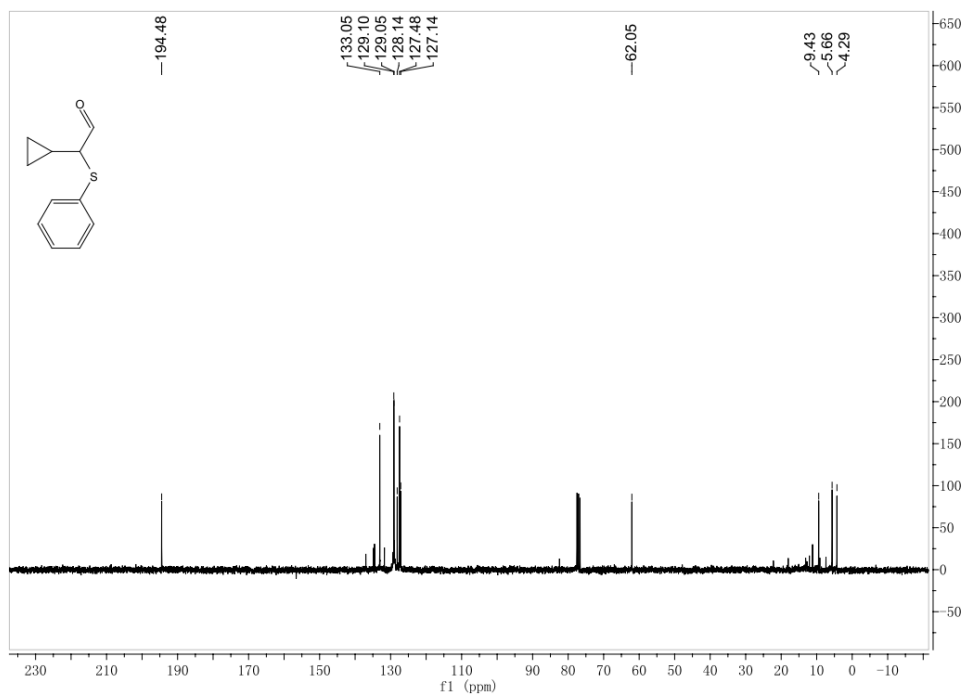

Compound 4k

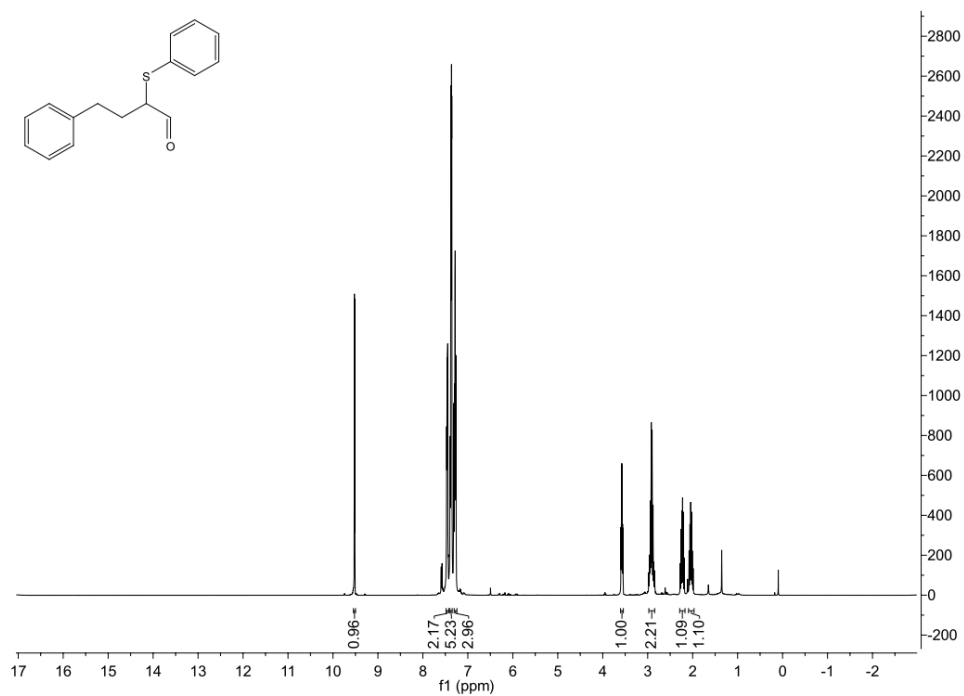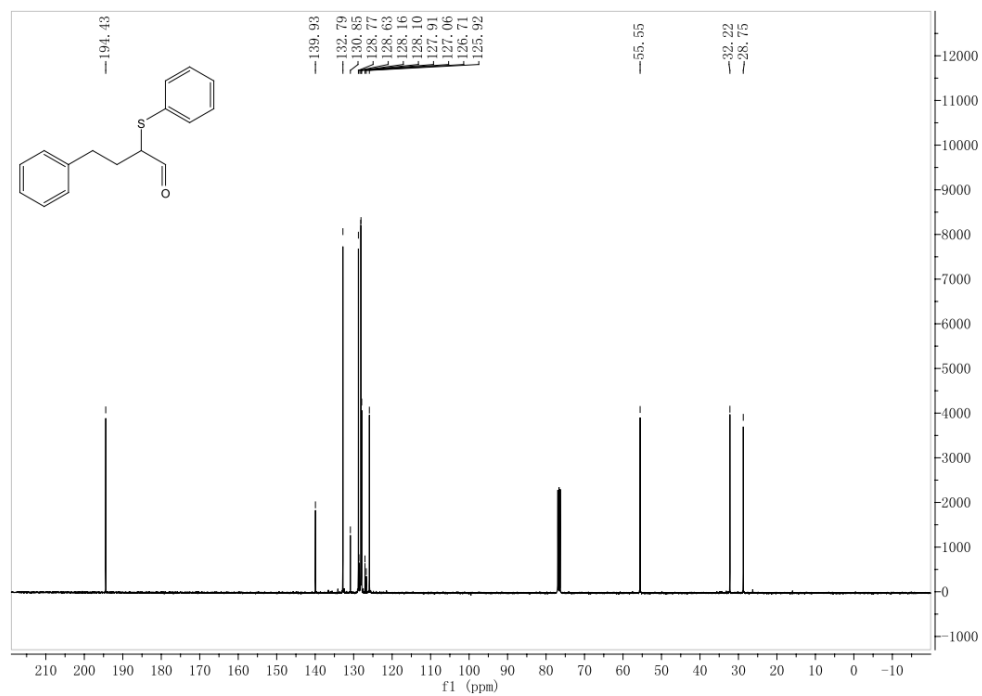

**Compound 4l**

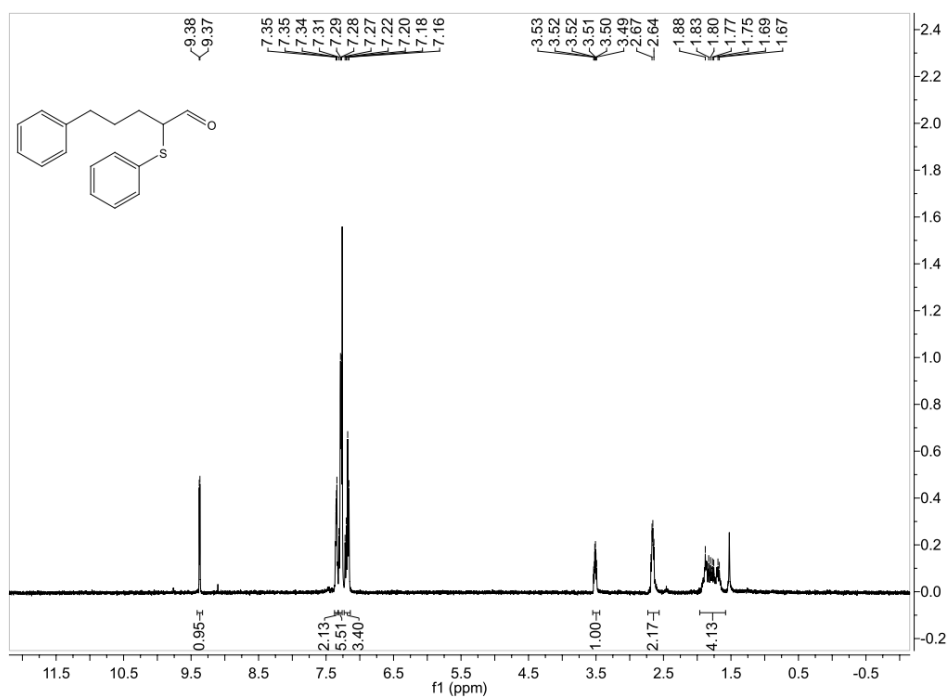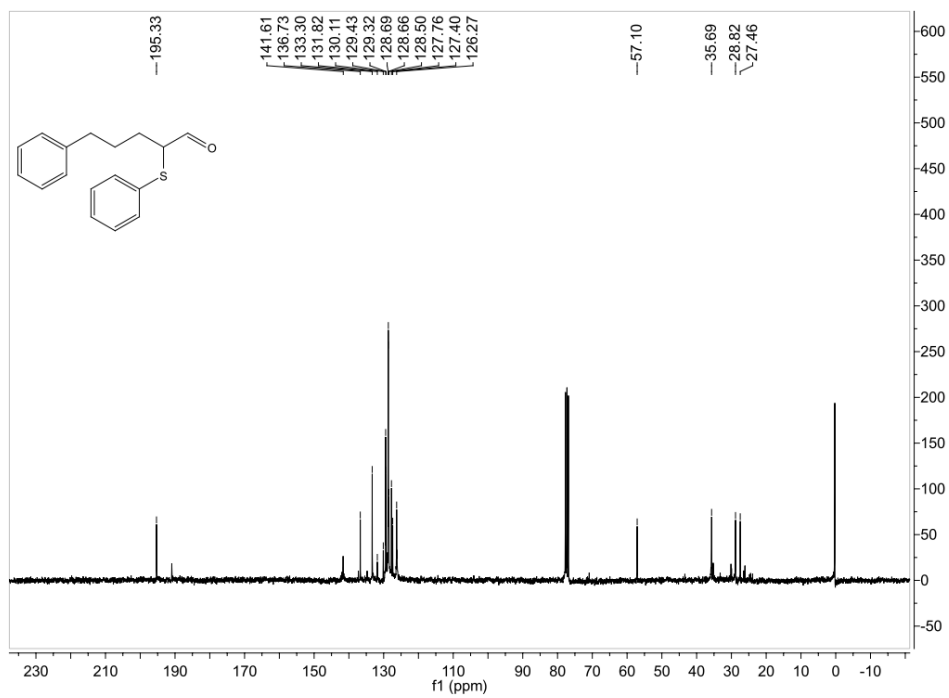

# Compound 3m

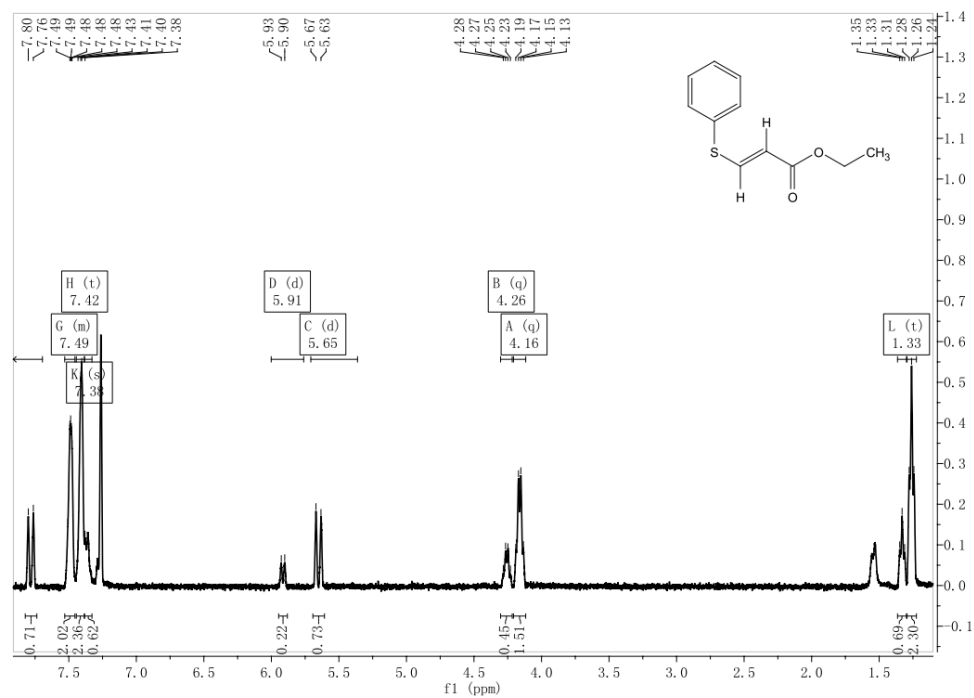

# Compound 3n

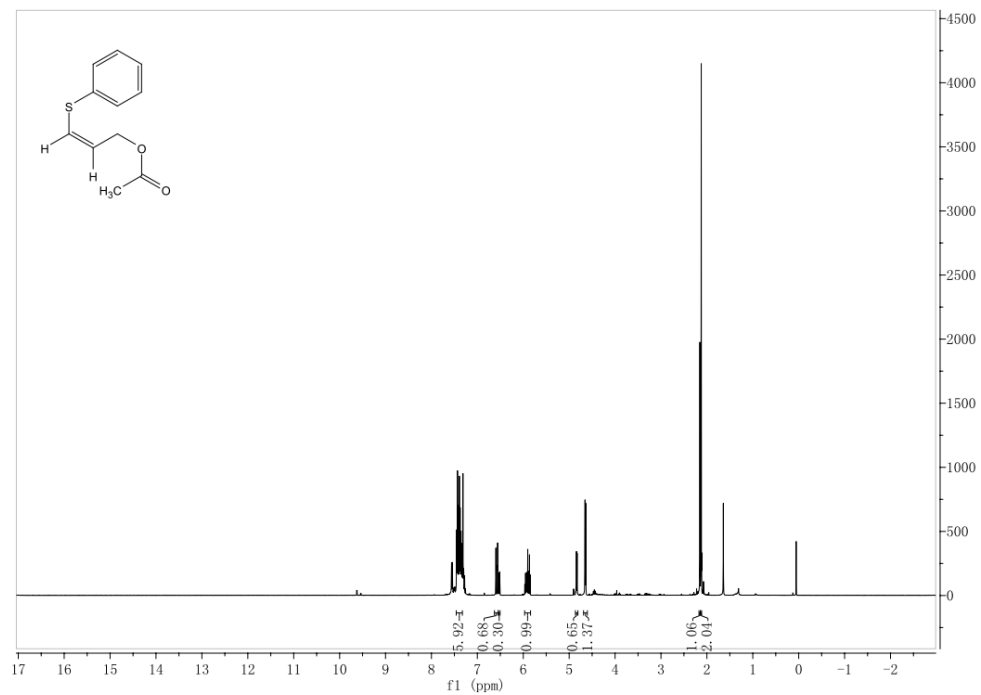

**Compound 3o**

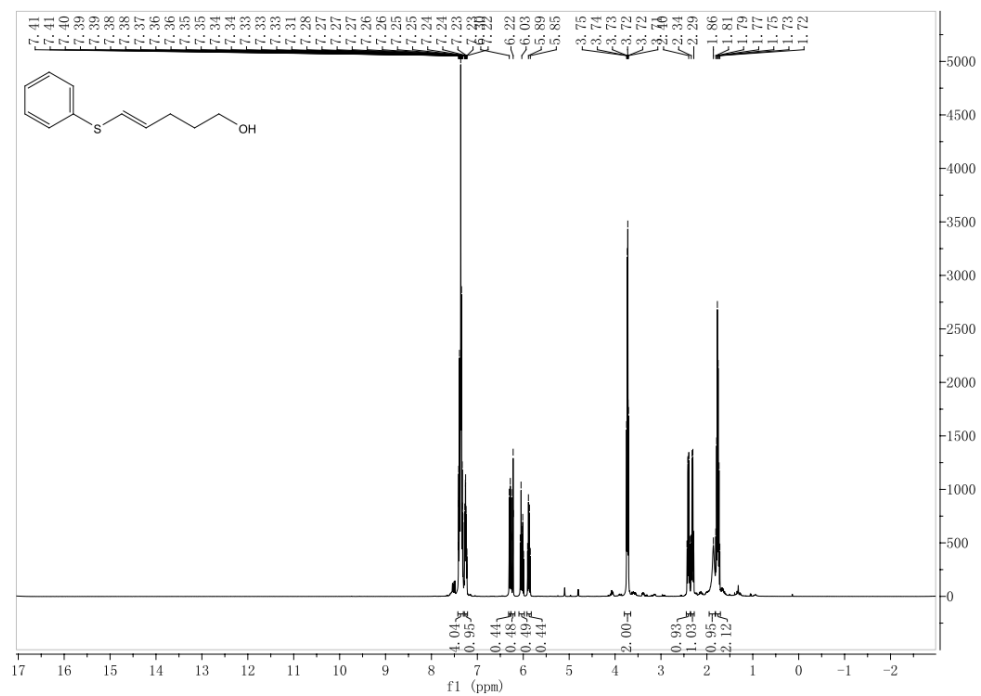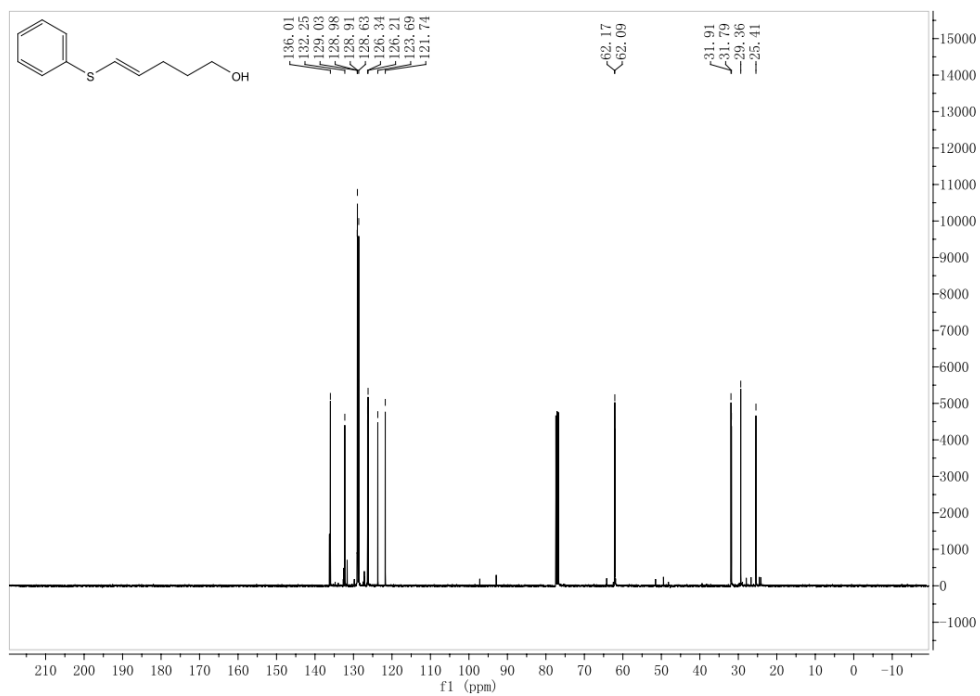



### Compound 3p

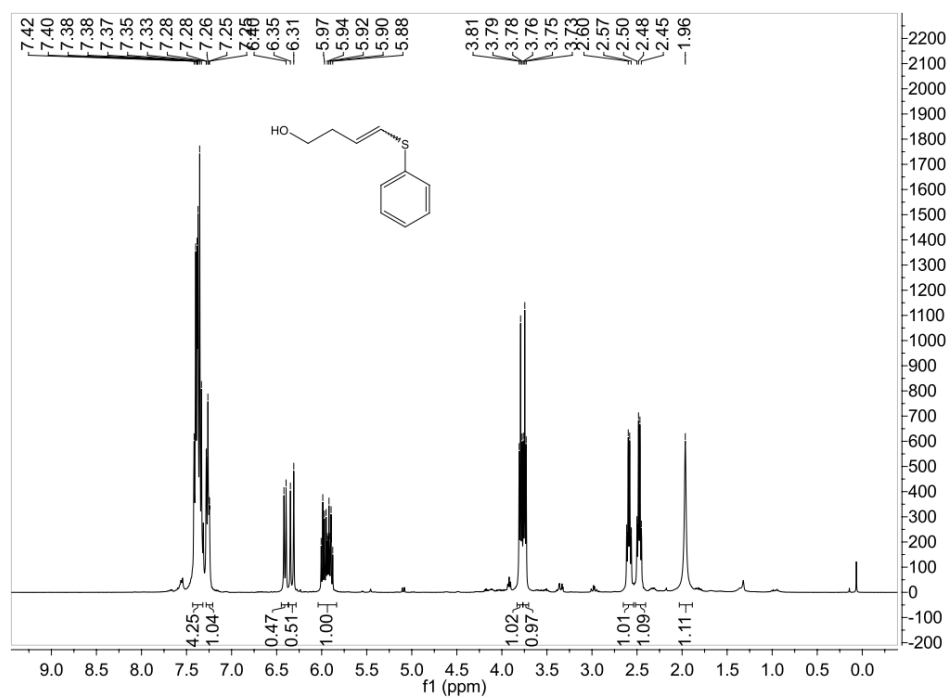

### Compound 3ba

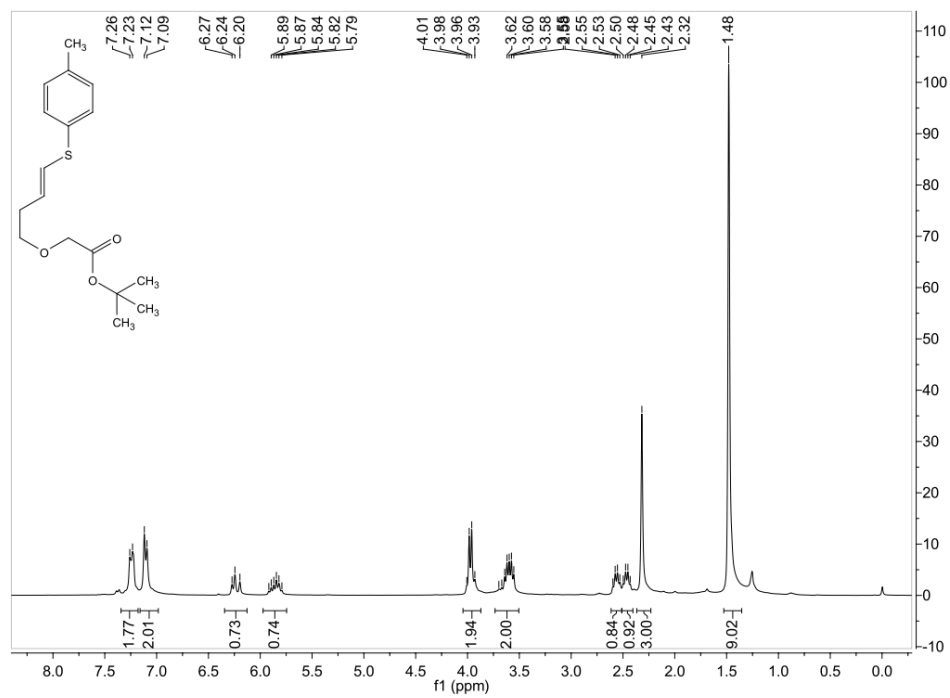

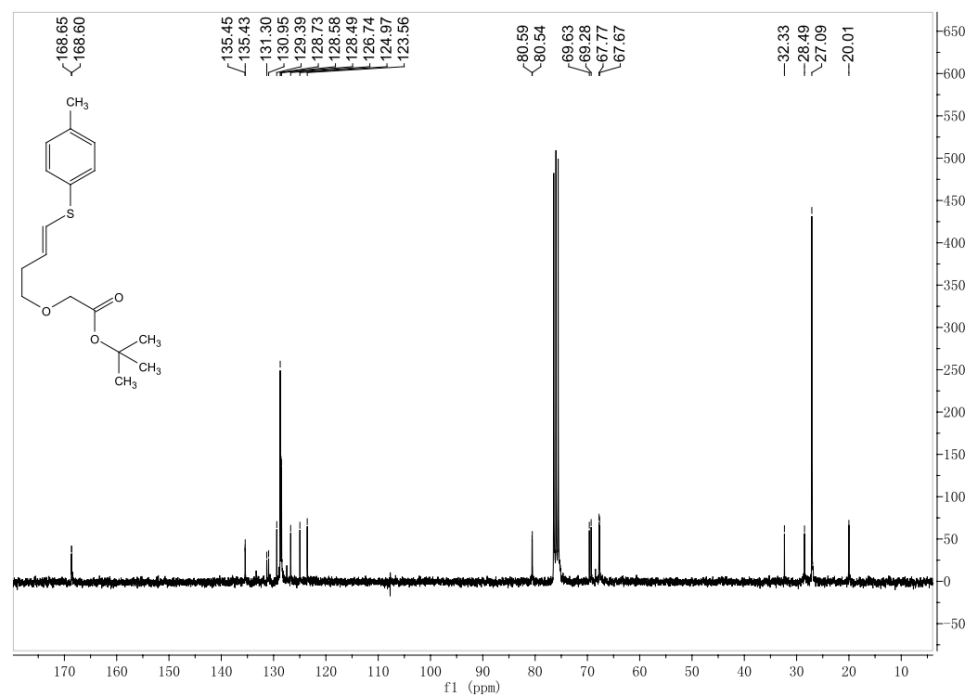

**Compound 4ba**

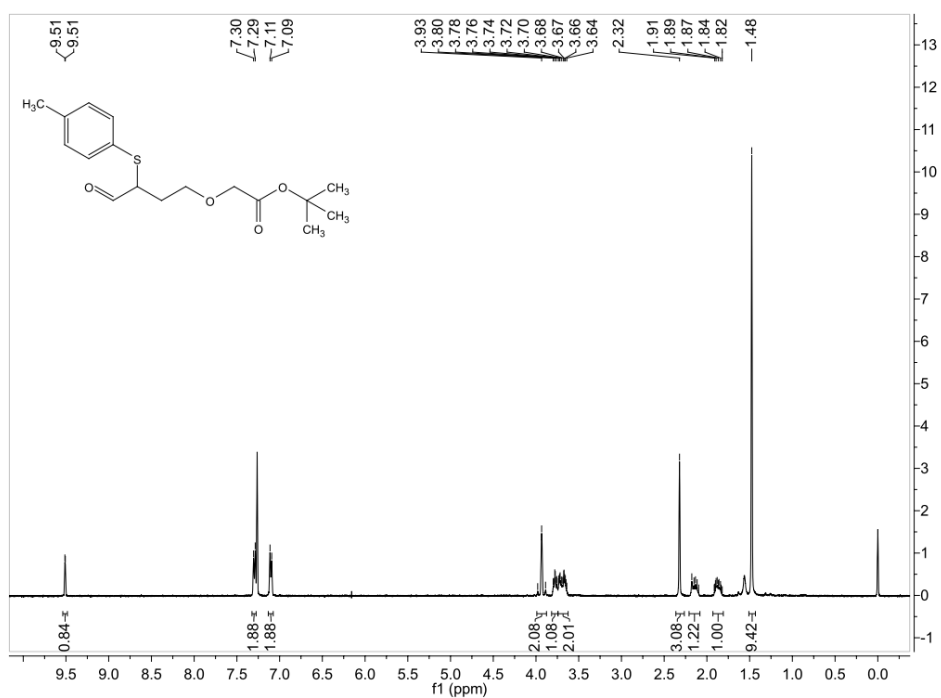

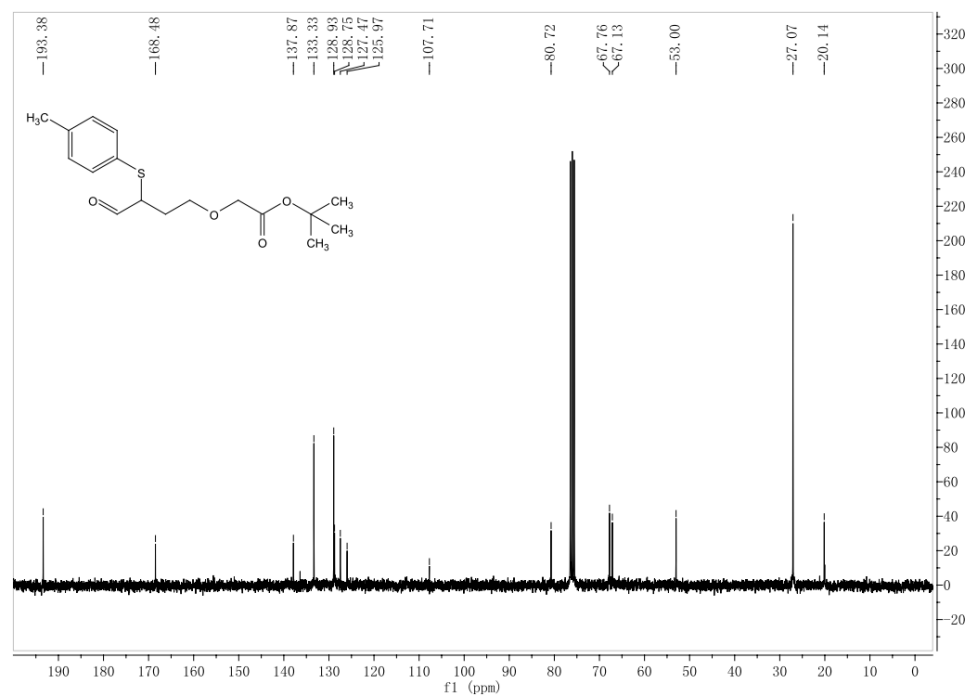

### Compound 3ca

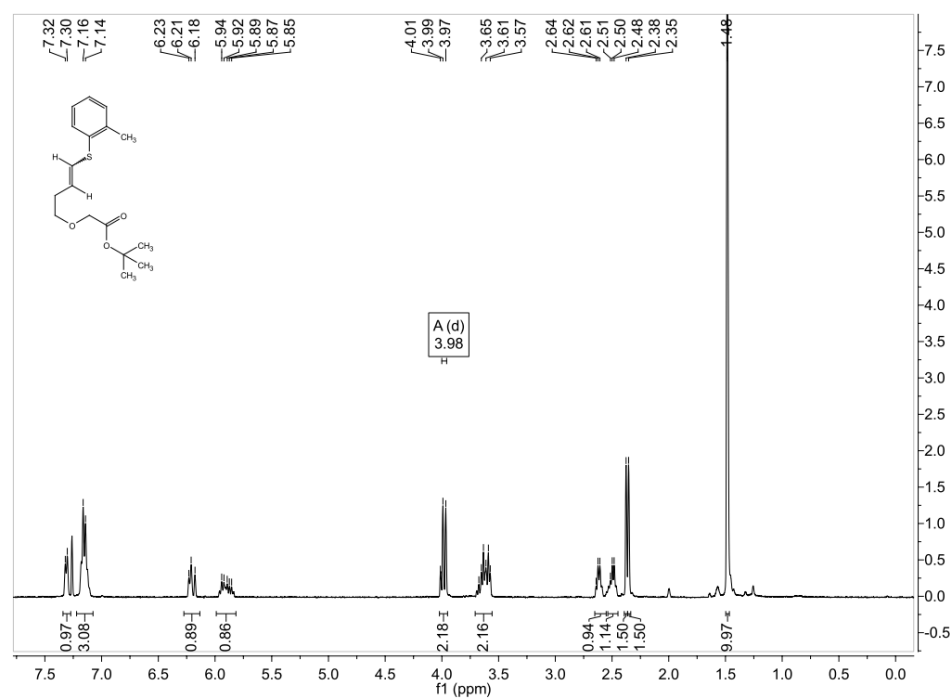

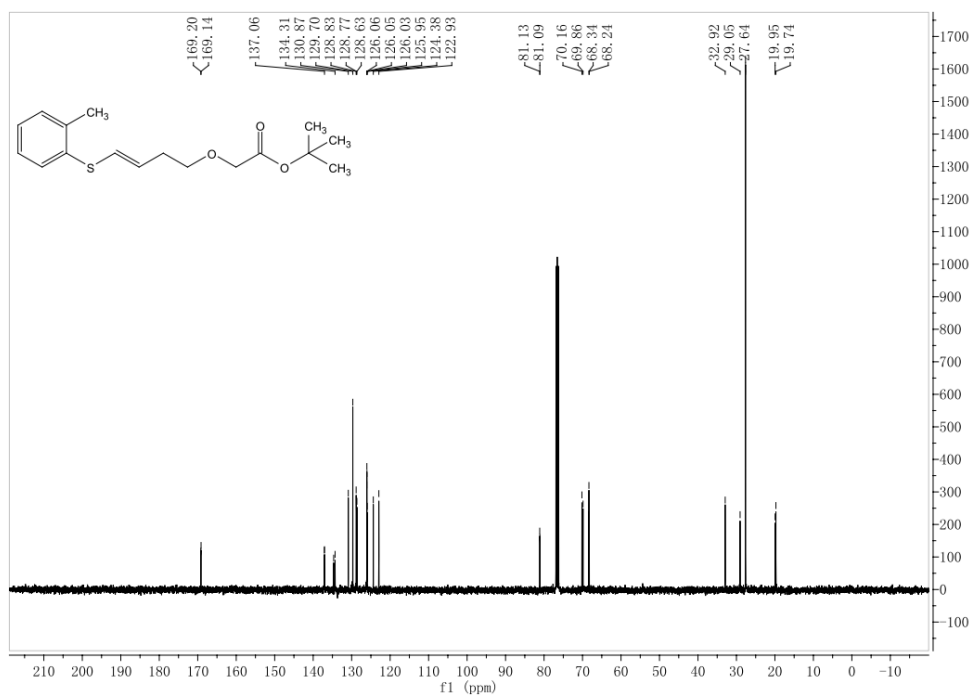

### Compounds 4ca

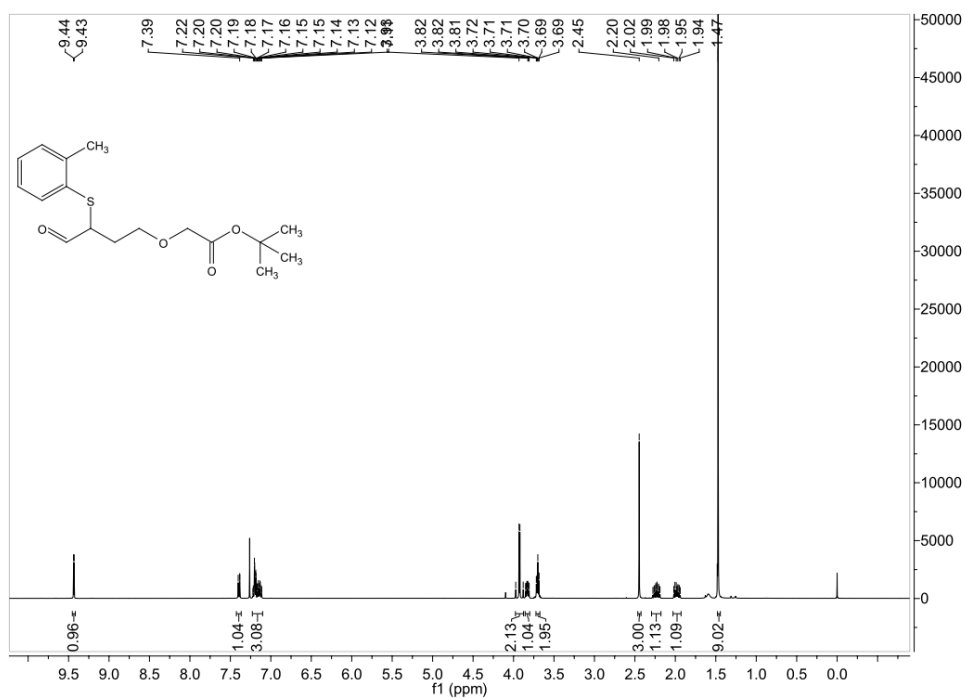

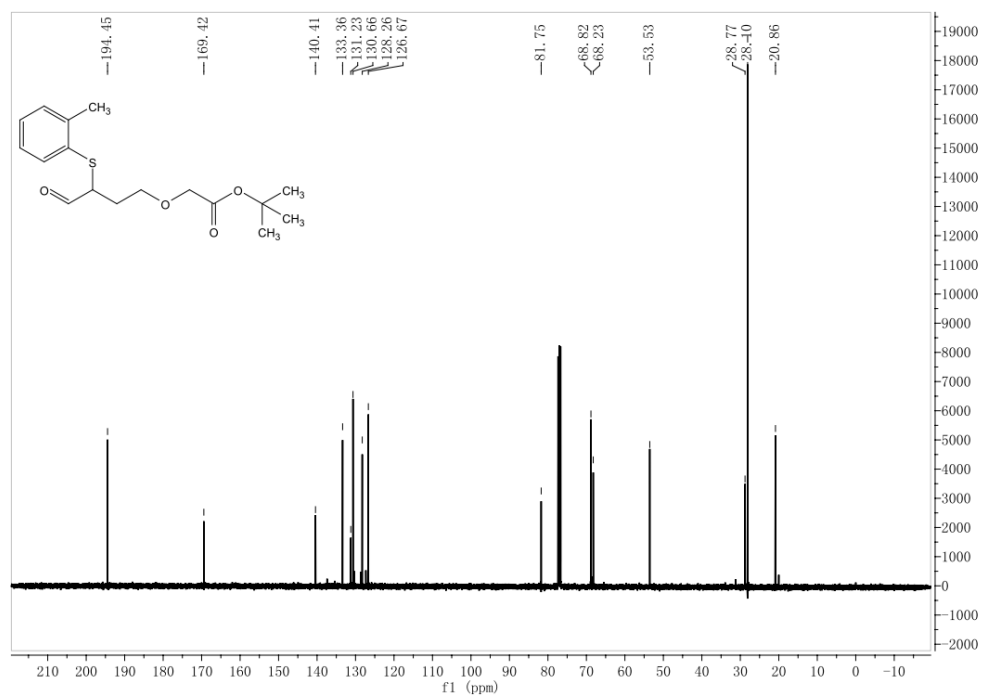

### Compound 3da

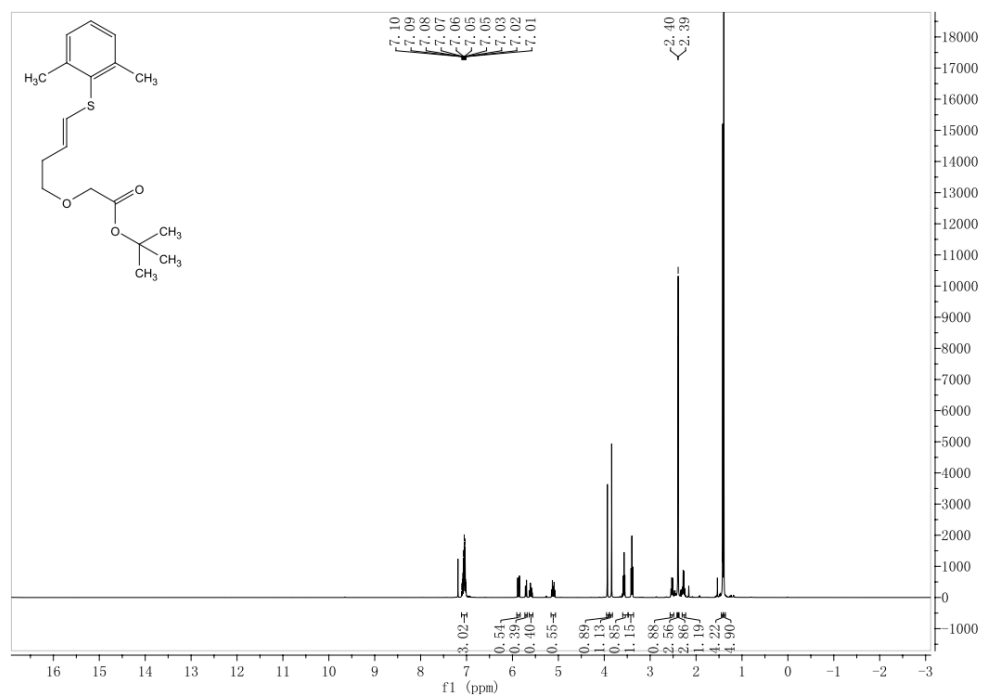

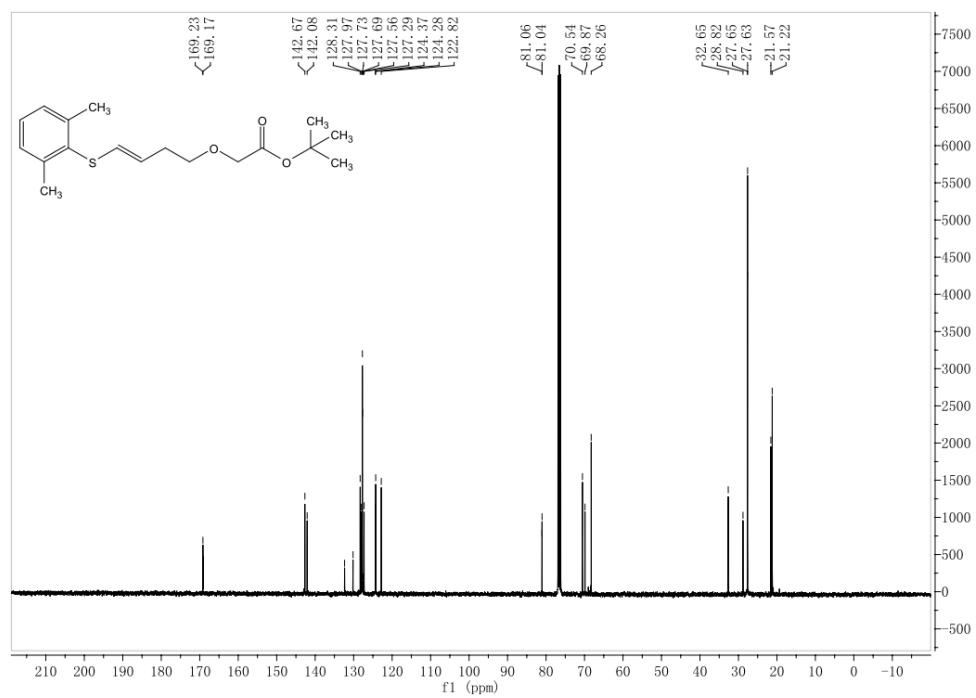

**Compound 4ga**

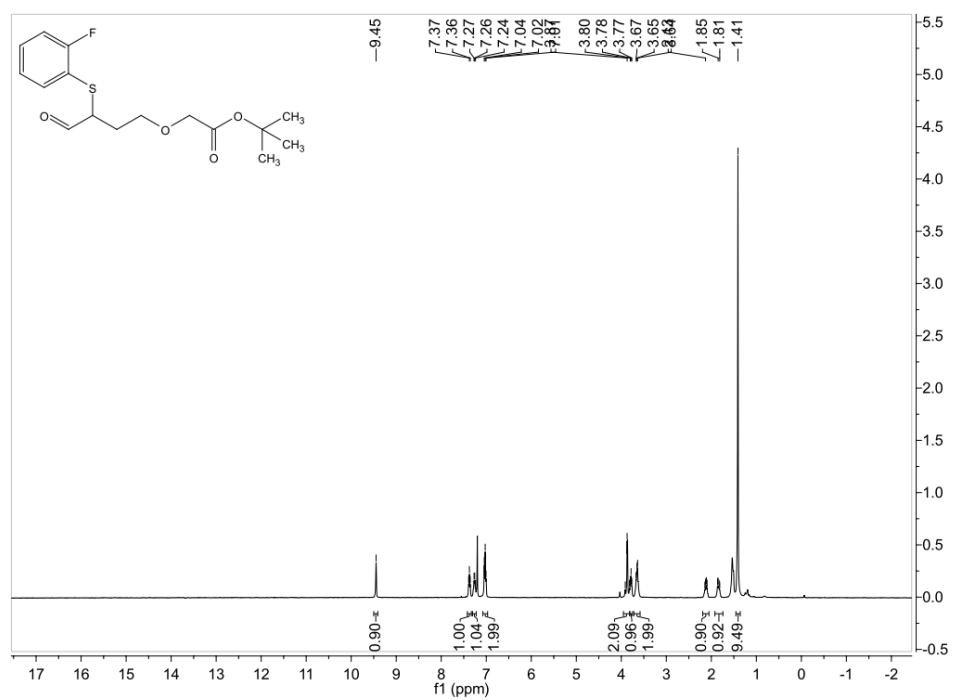

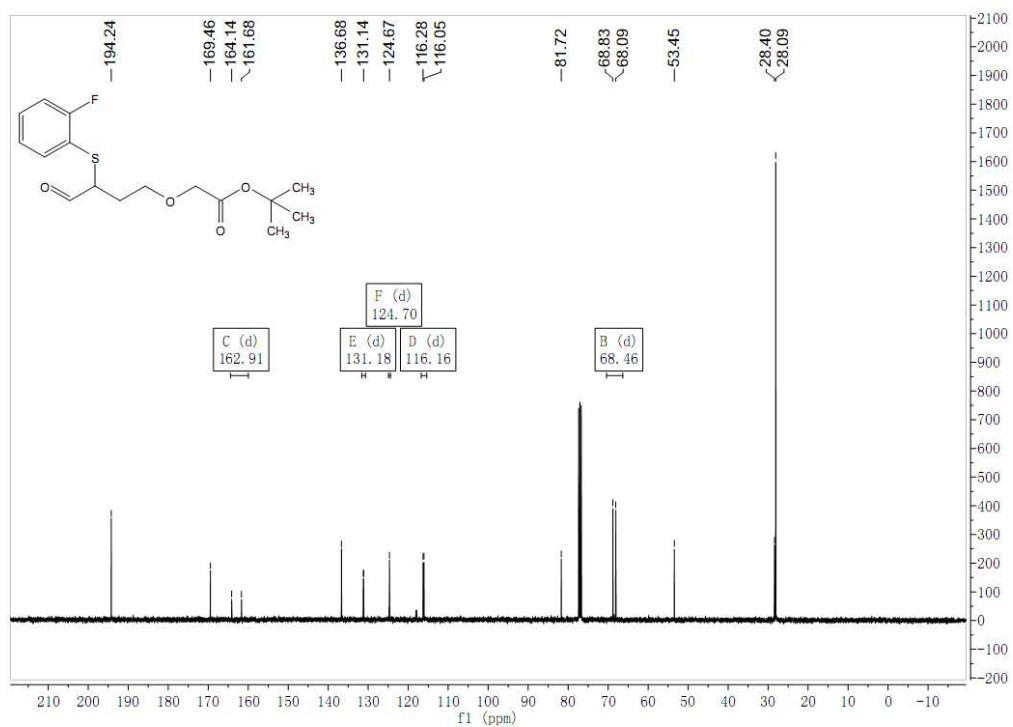

Compound 4ha

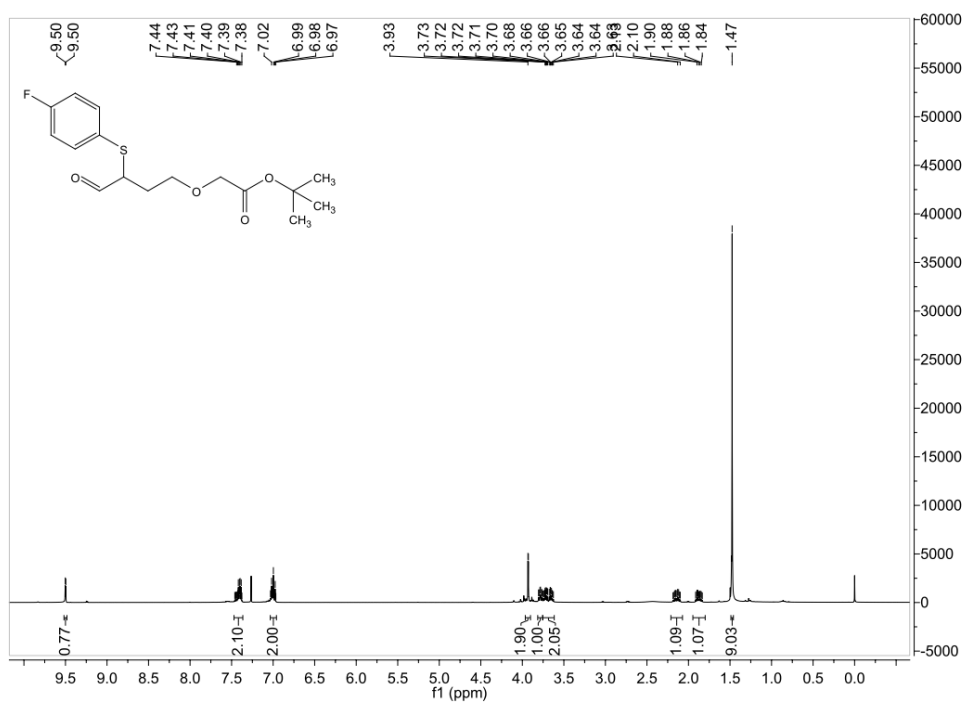

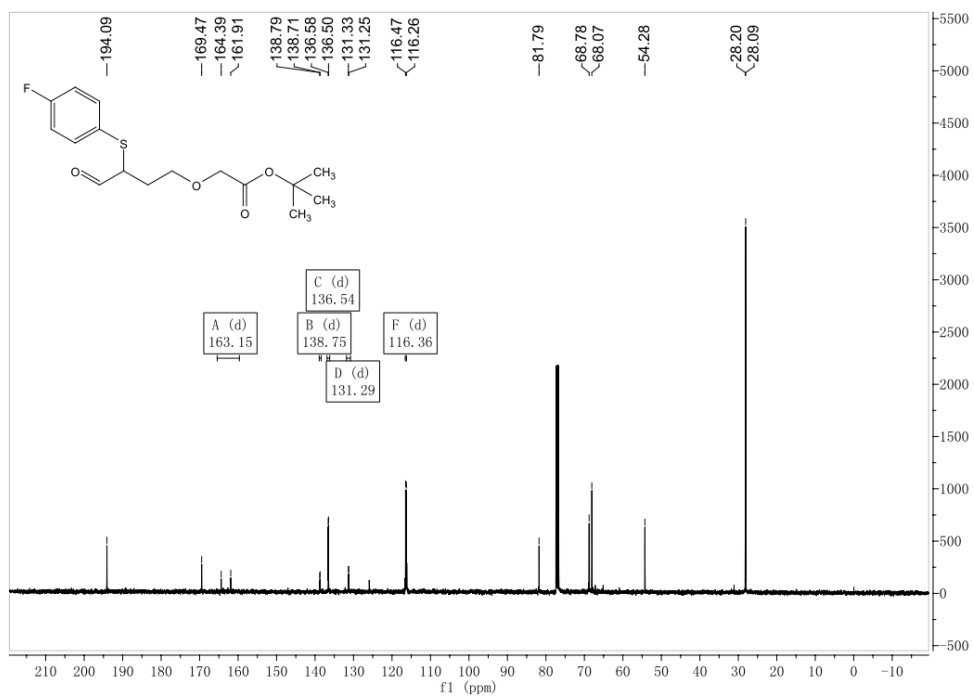

### Compound 4ia

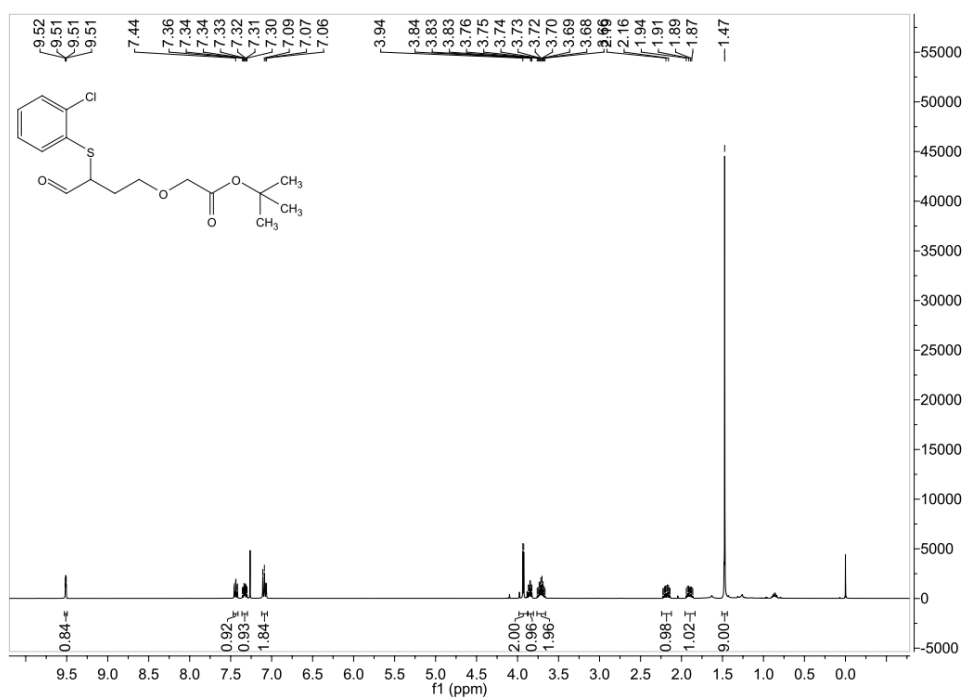



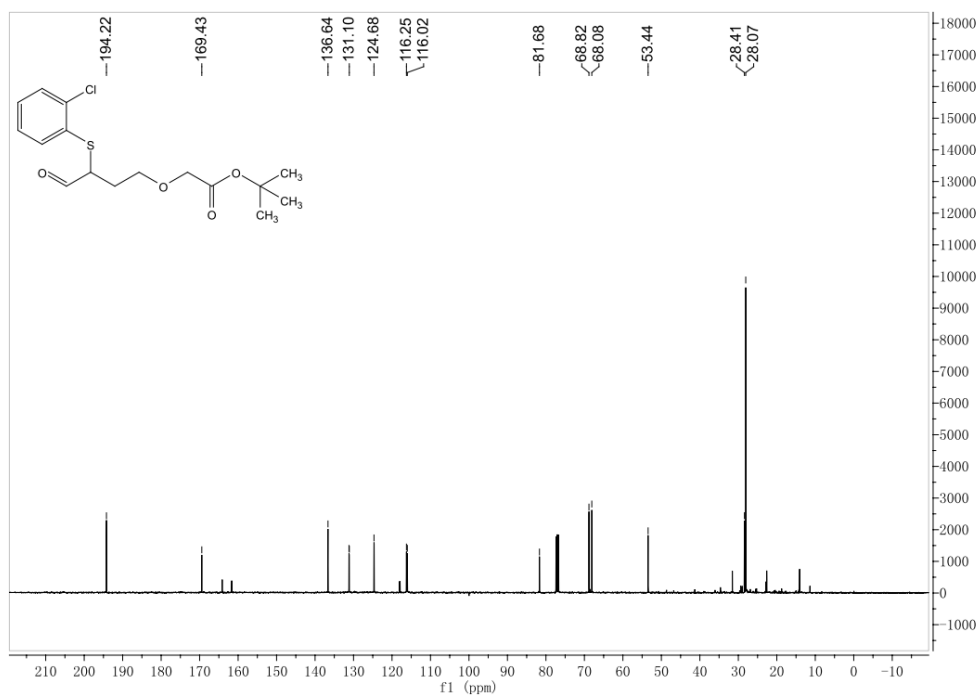

**Compound 3ja**

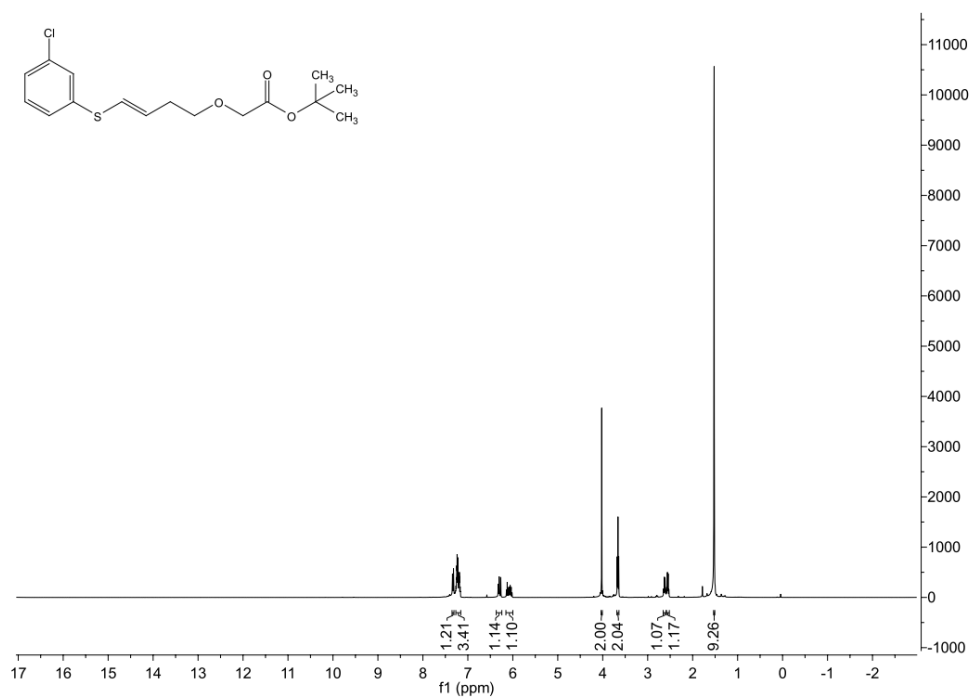

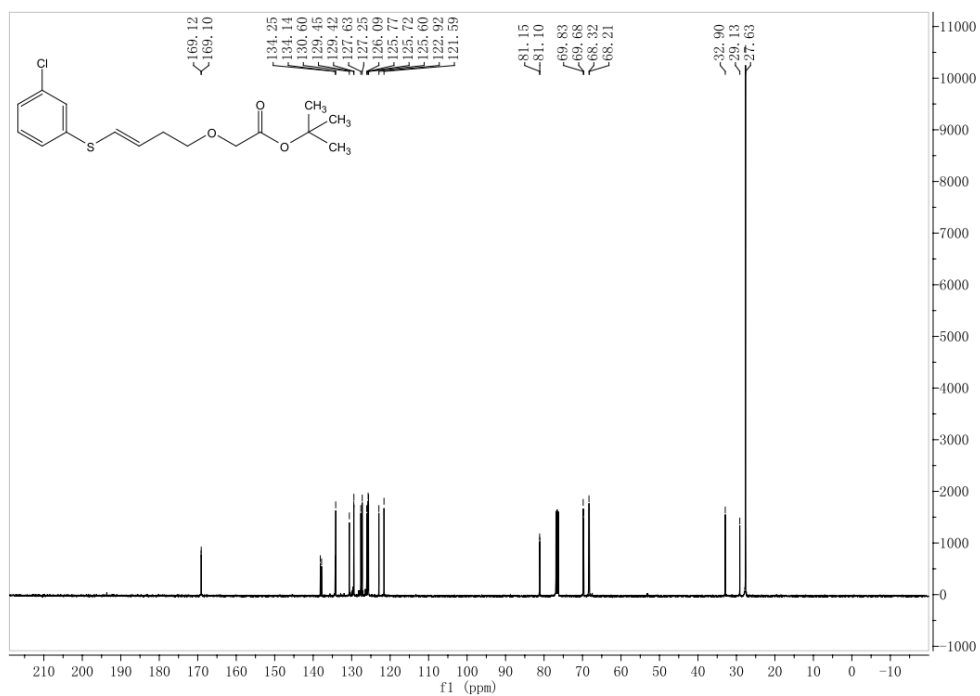

### Compound 4ja

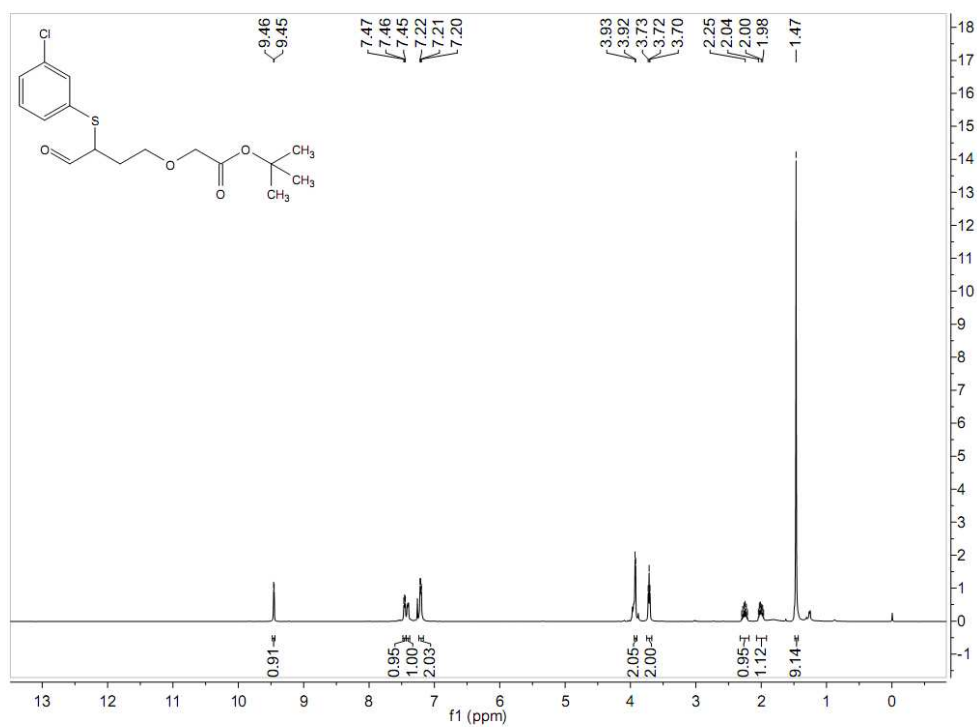

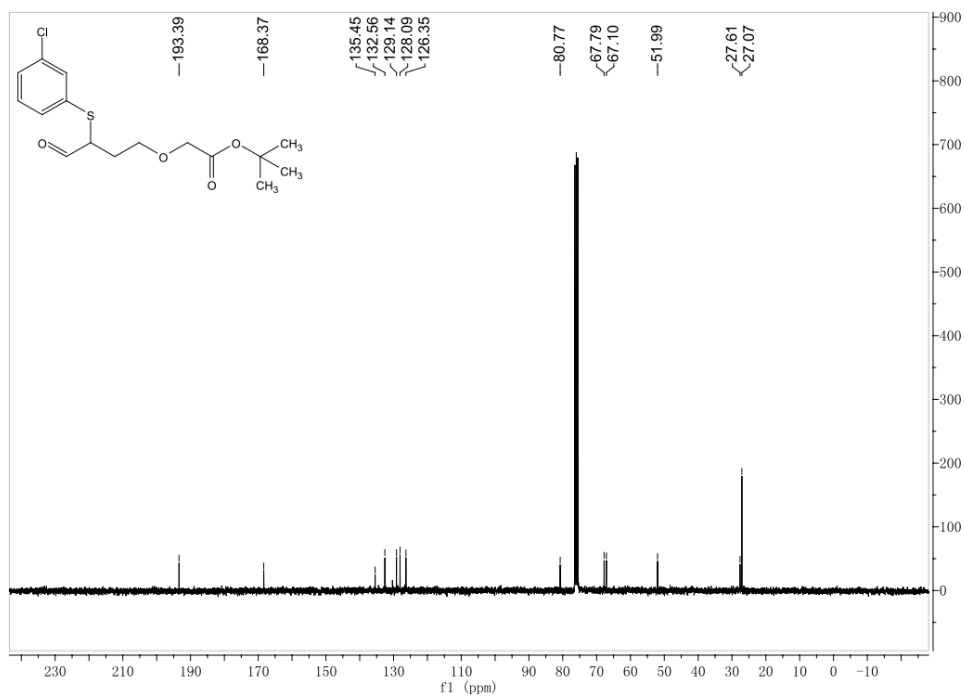

### Compound 2b'

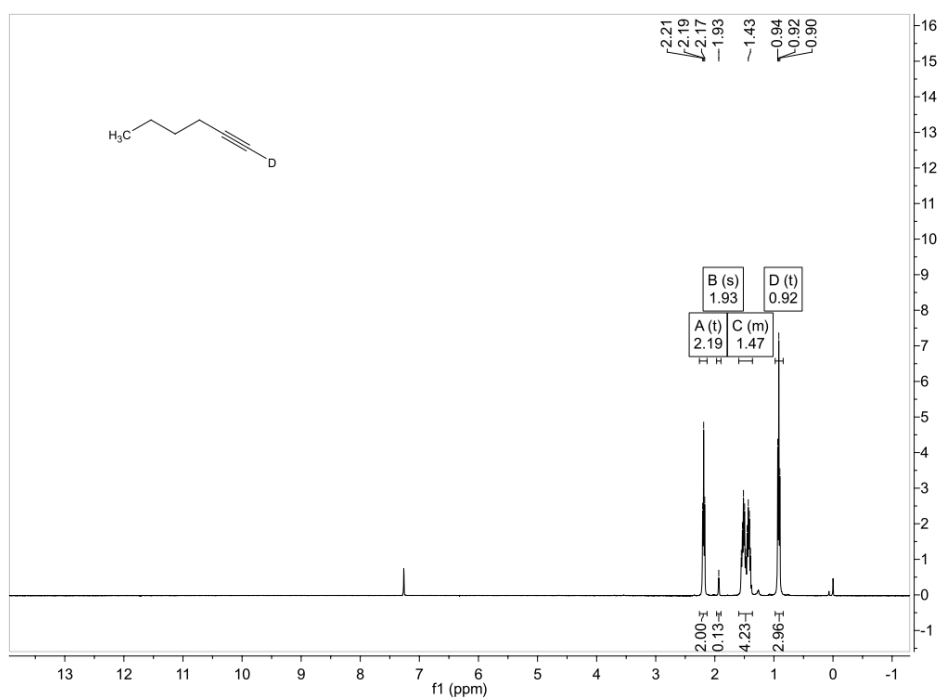

**Compound 4b'**

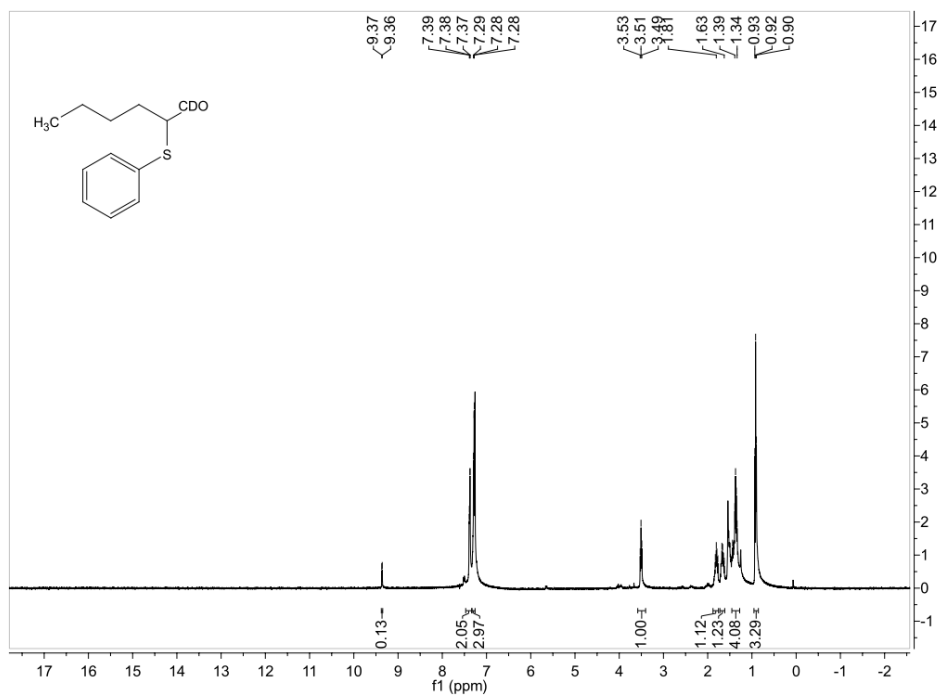

**Compound 6**

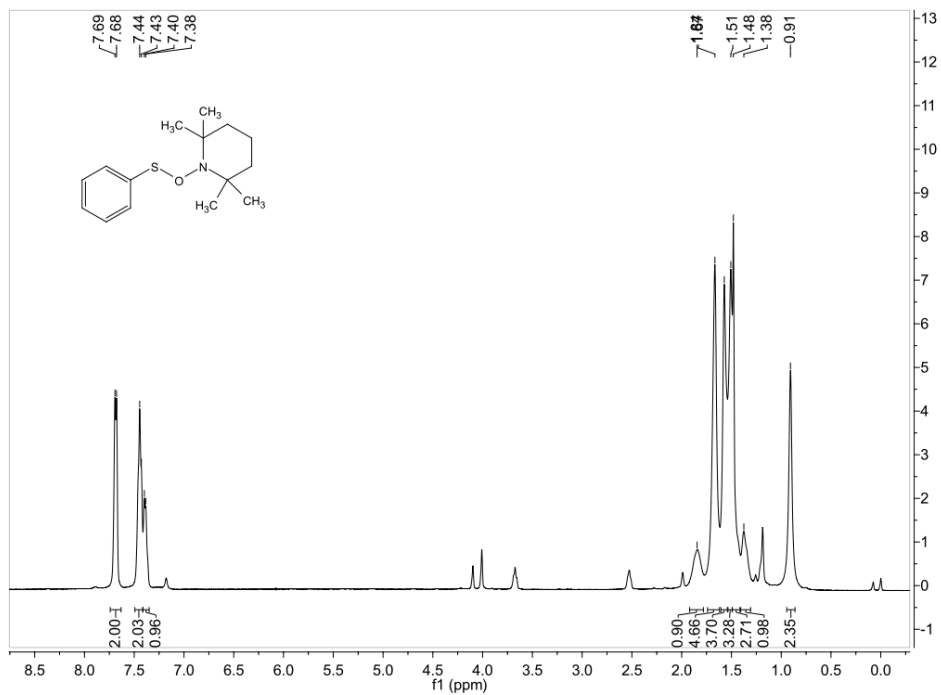

Supplement: Supplementary file 1 [file 3800368]
